# Supplementary material for: Insights into non-autoimmune type 1 diabetes with 13 novel loci in low polygenic risk score patients
Source: PubMed Central journal article supplement (PMC8346538; doi:10.1038/s41598-021-94994-9), 2021-08-06
Supplement: 41598_2021_94994_MOESM1_ESM.pdf [file 41598_2021_94994_MOESM1_ESM.pdf]

# **Insights into Non-autoimmune Type 1 Diabetes with 13 Novel Loci in Low Polygenic Risk Score Patients**

Jingchun Qu, Hui-Qi Qu, Jonathan P Bradfield, Joseph T Glessner, Xiao Chang, Lifeng Tian, Michael March, John J Connolly, Jeffrey D Roizen, Patrick MA Sleiman, Hakon Hakonarson

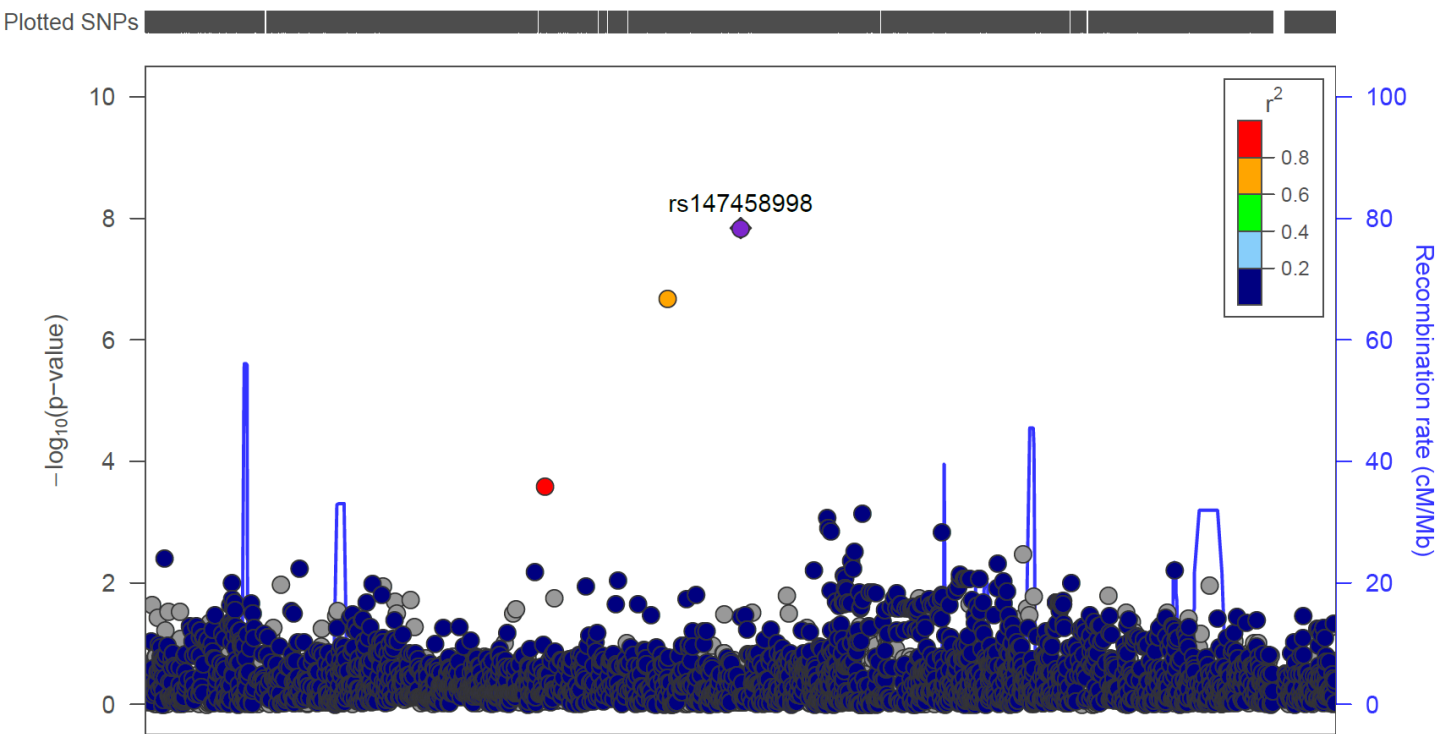

a.

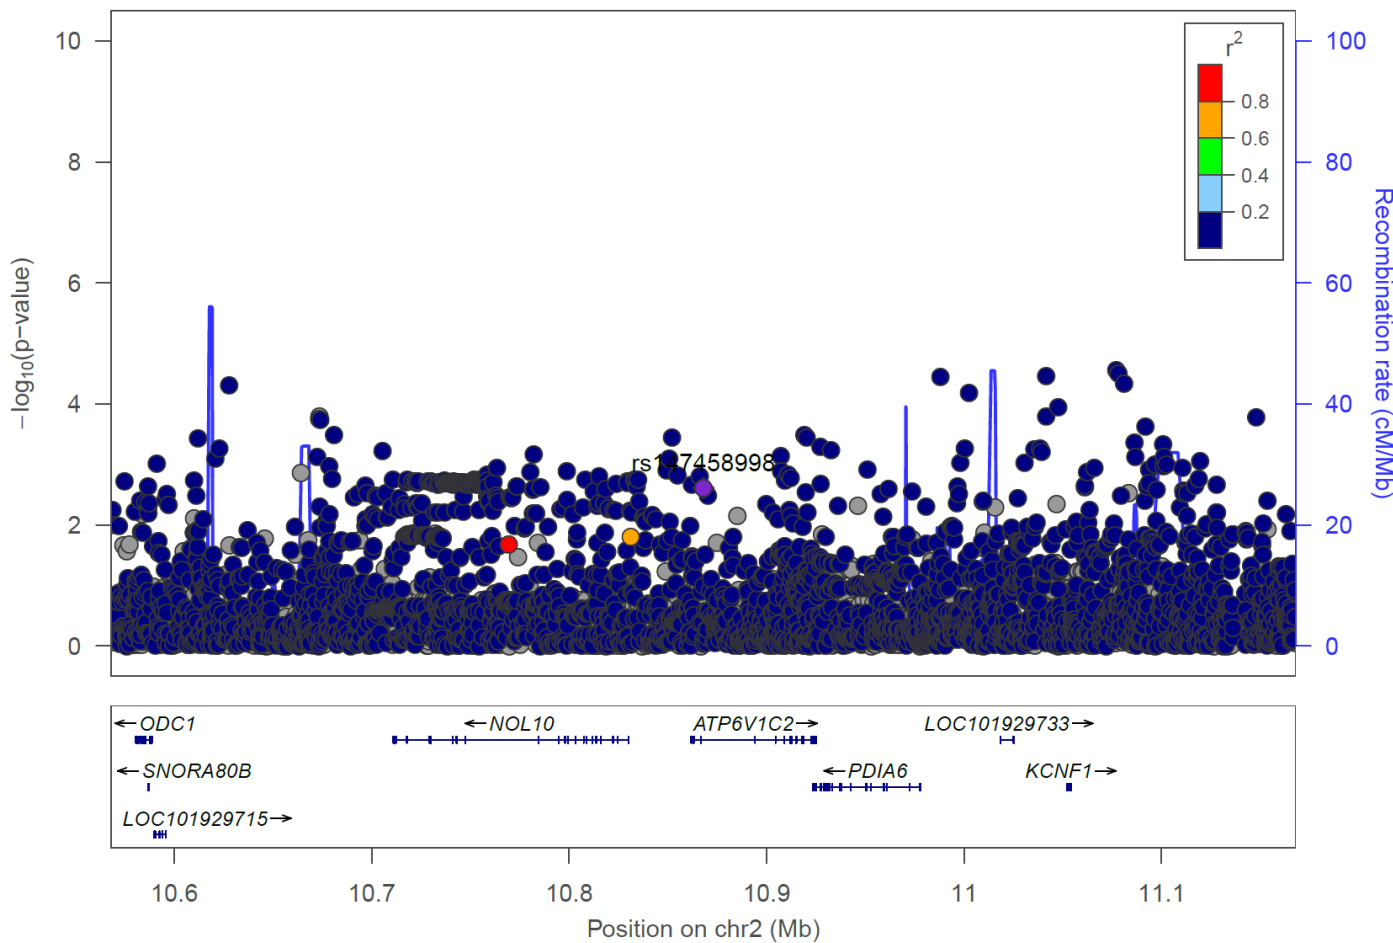

b.

**Supplementary Figure 1.** The LocusZoom plots for the *ATP6V1C2* locus (rs147458998). (a) The plot of the association tests of T1D patients with low T1D PRS compared to controls with low T1D PRS; (b) The plot of the association tests of all T1D patients compared to all controls.

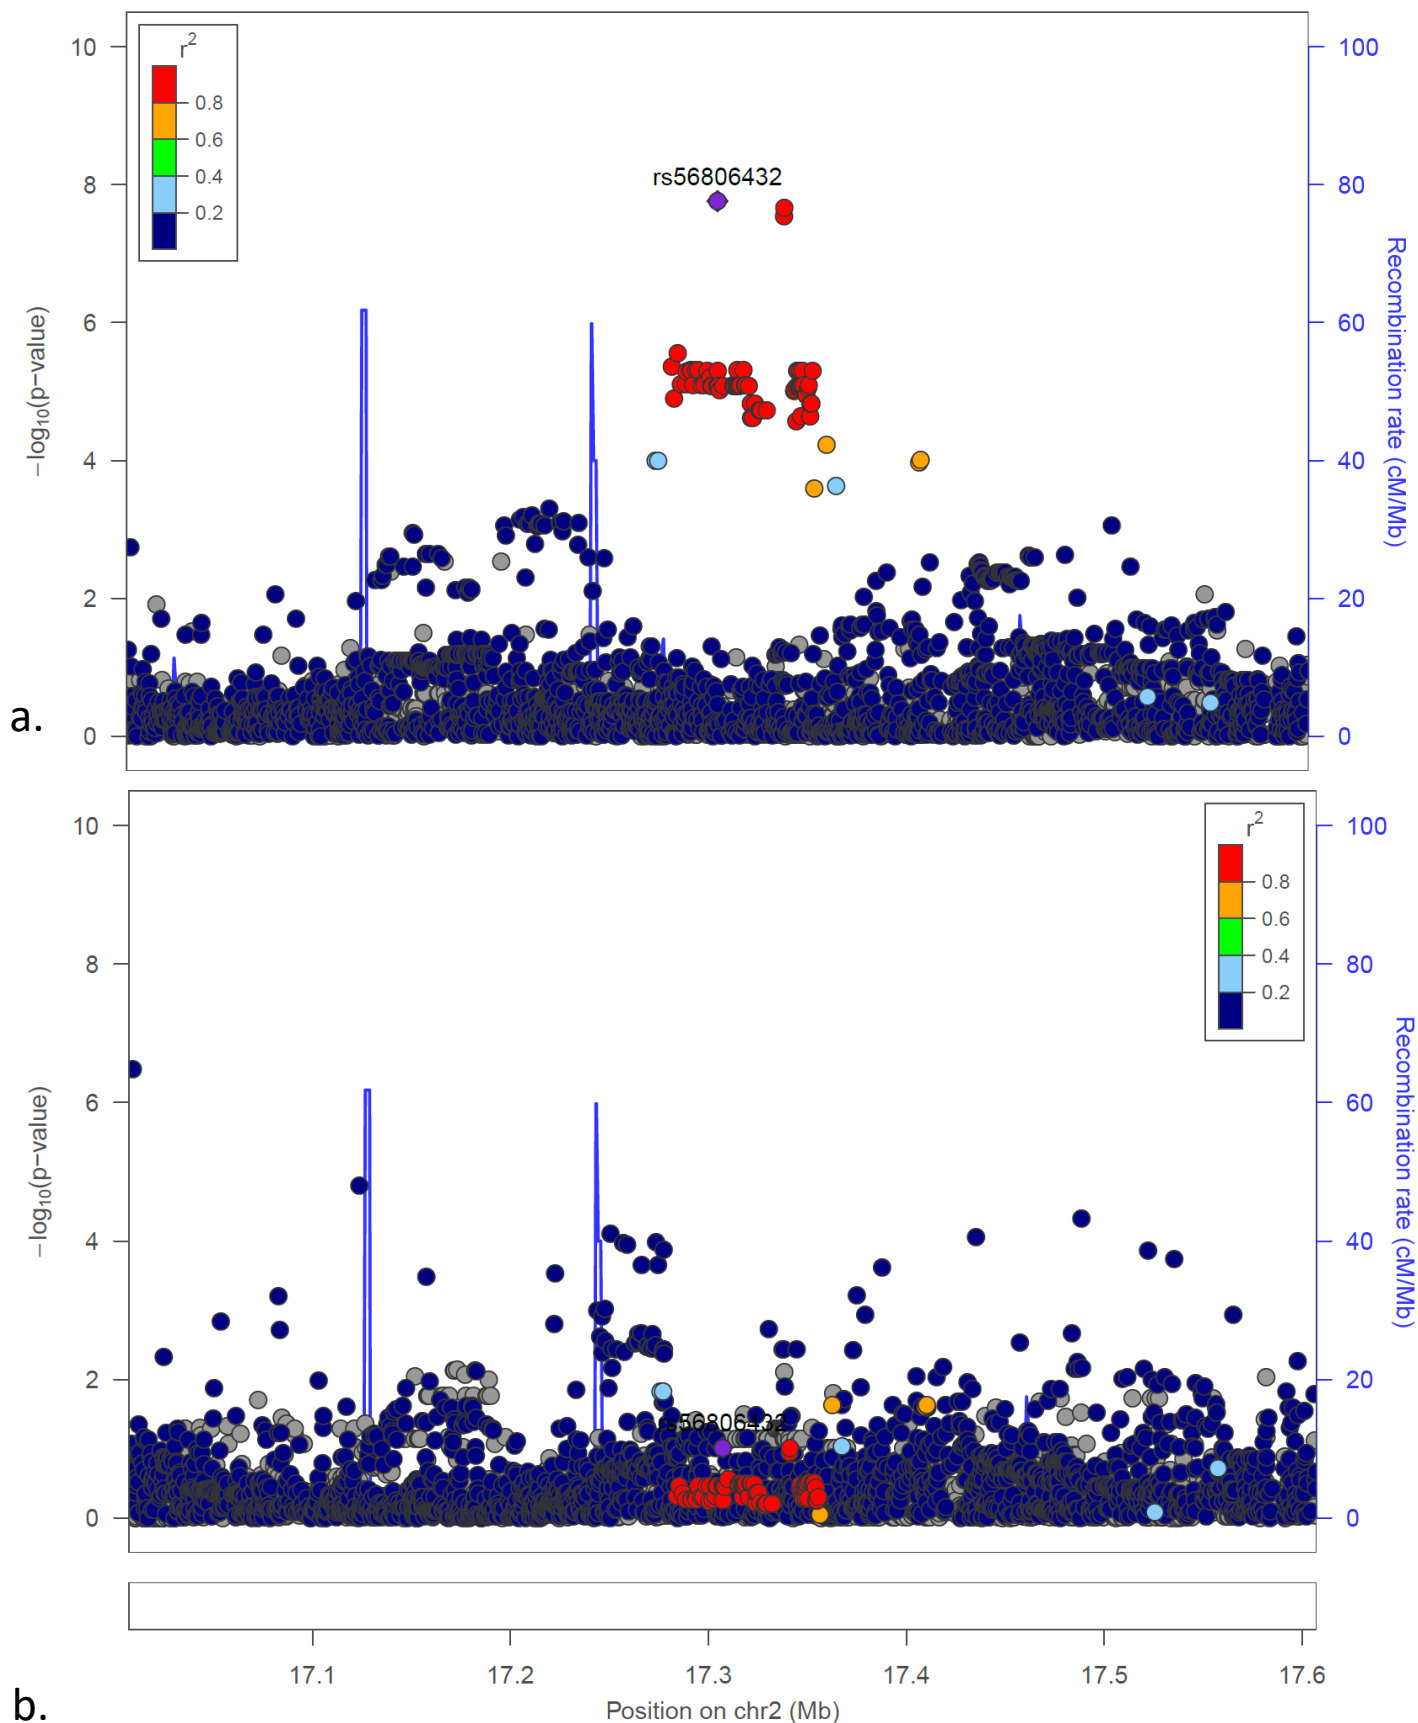

**Supplementary Figure 2.** The LocusZoom plots for the *FAM49A/RAD51AP2* locus (rs56806432). (a) The plot of the association tests of T1D patients with low T1D PRS compared to controls with low T1D PRS; (b) The plot of the association tests of all T1D patients compared to all controls.

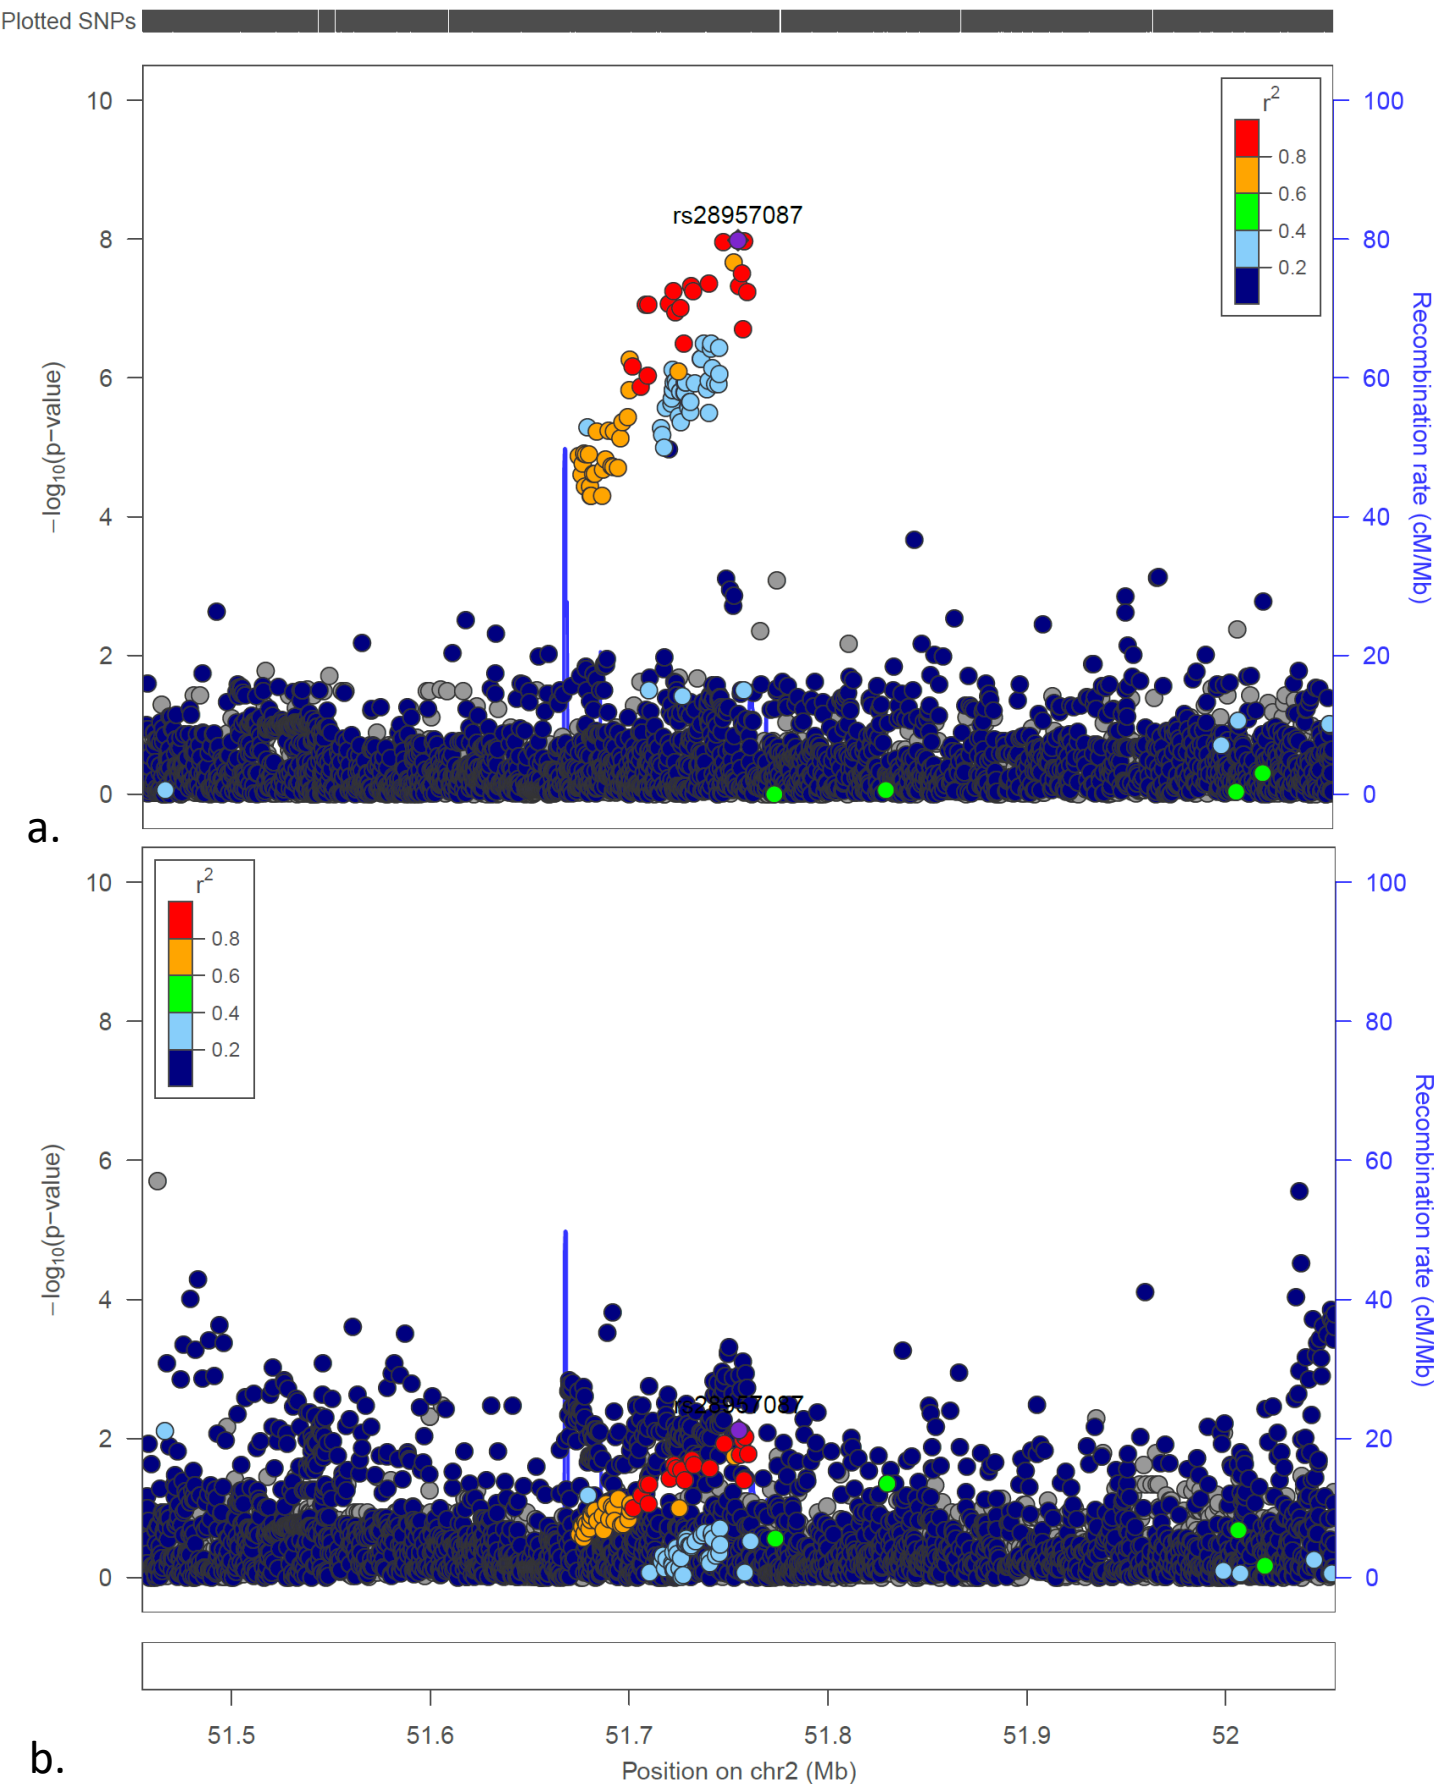

**Supplementary Figure 3.** The LocusZoom plots for the *LOC730100* locus (rs28957087). (a) The plot of the association tests of T1D patients with low T1D PRS compared to controls with low T1D PRS; (b) The plot of the association tests of all T1D patients compared to all controls.



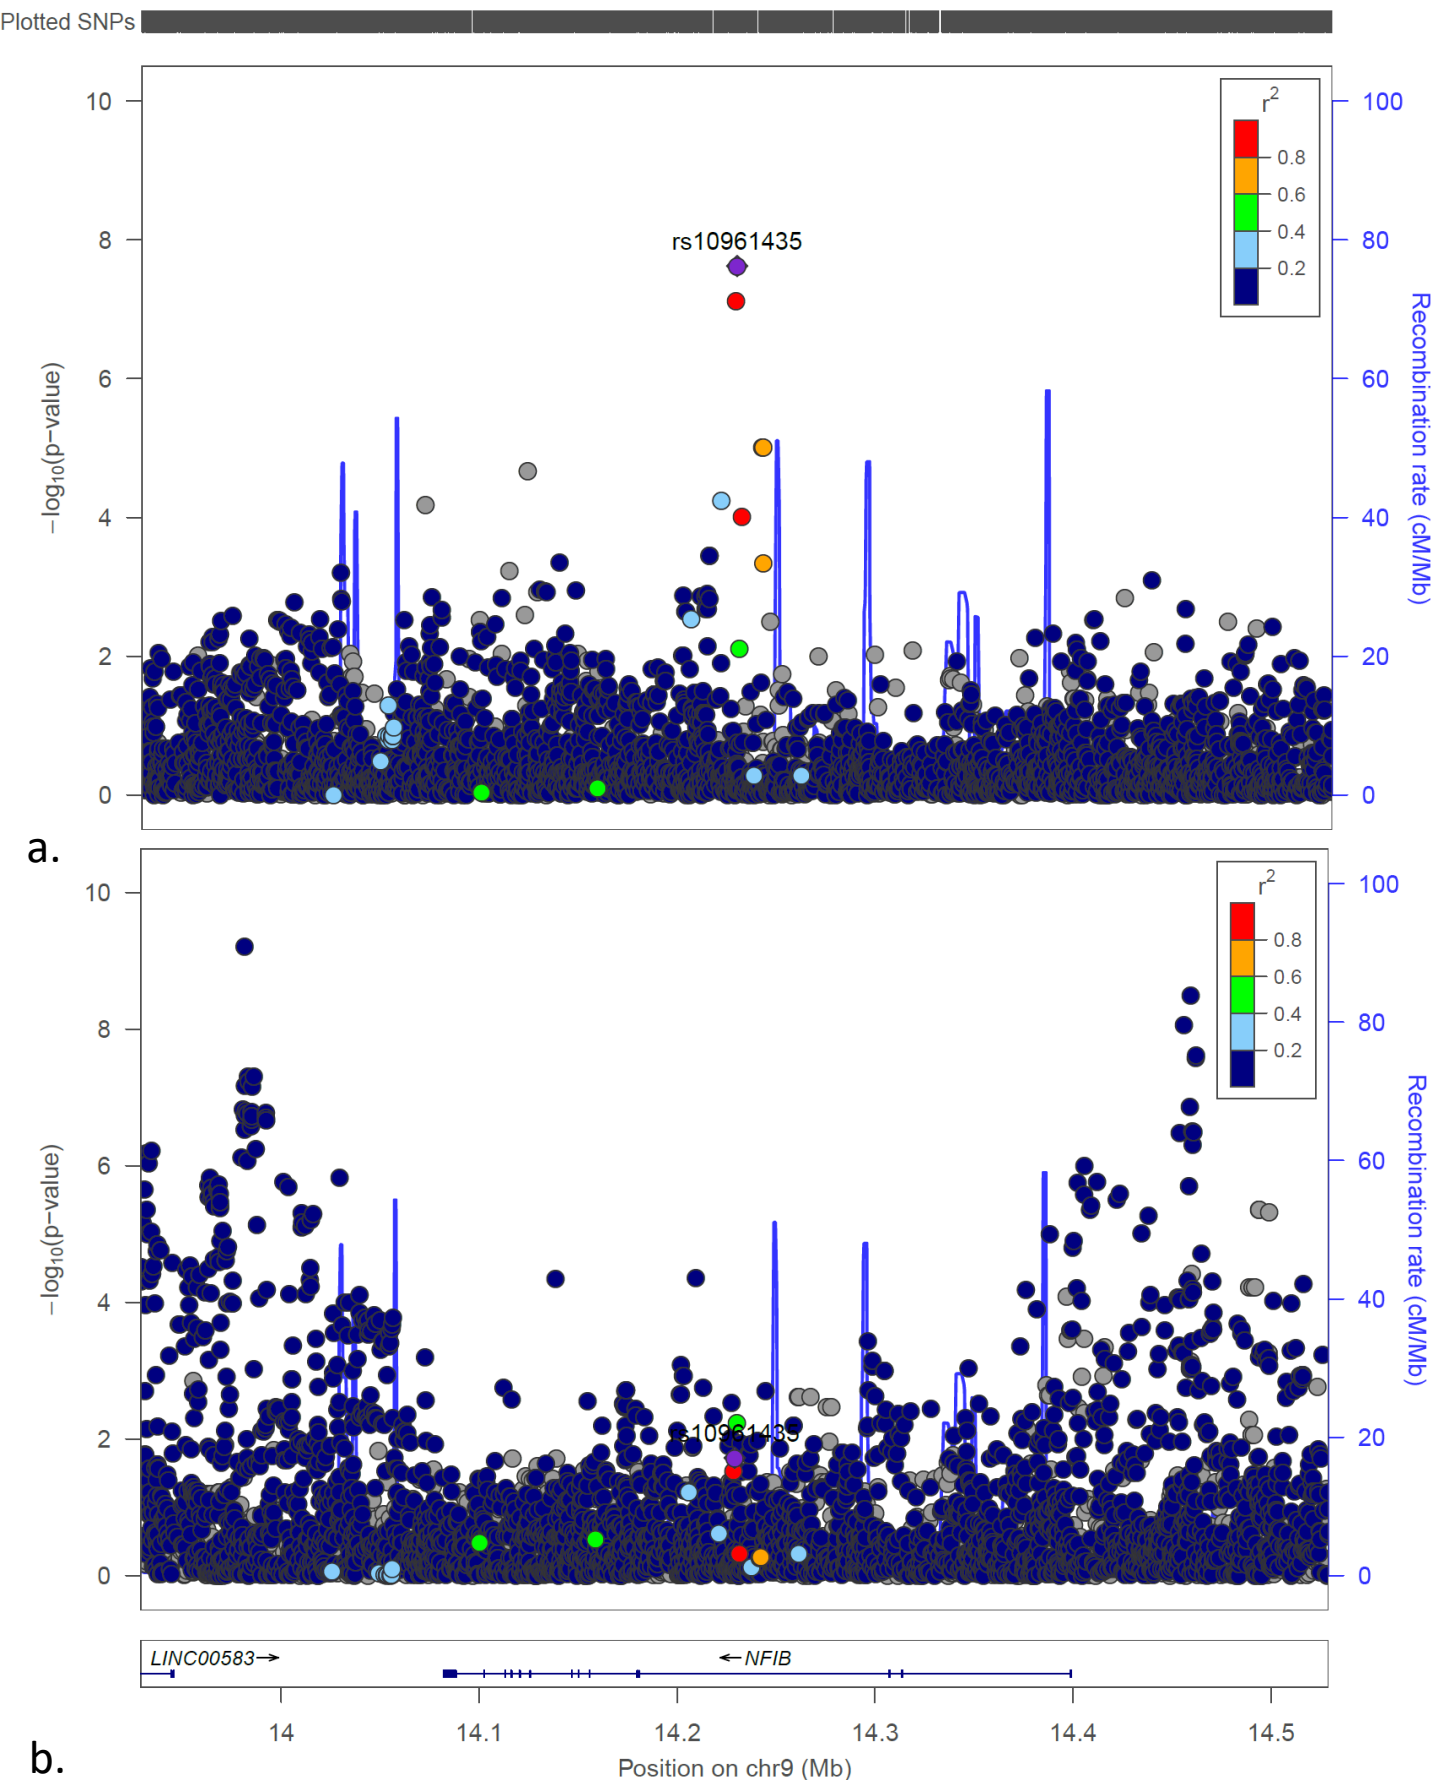

**Supplementary Figure 4.** The LocusZoom plots for the *NFIB* locus (rs10961435). (a) The plot of the association tests of T1D patients with low T1D PRS compared to controls with low T1D PRS; (b) The plot of the association tests of all T1D patients compared to all controls.

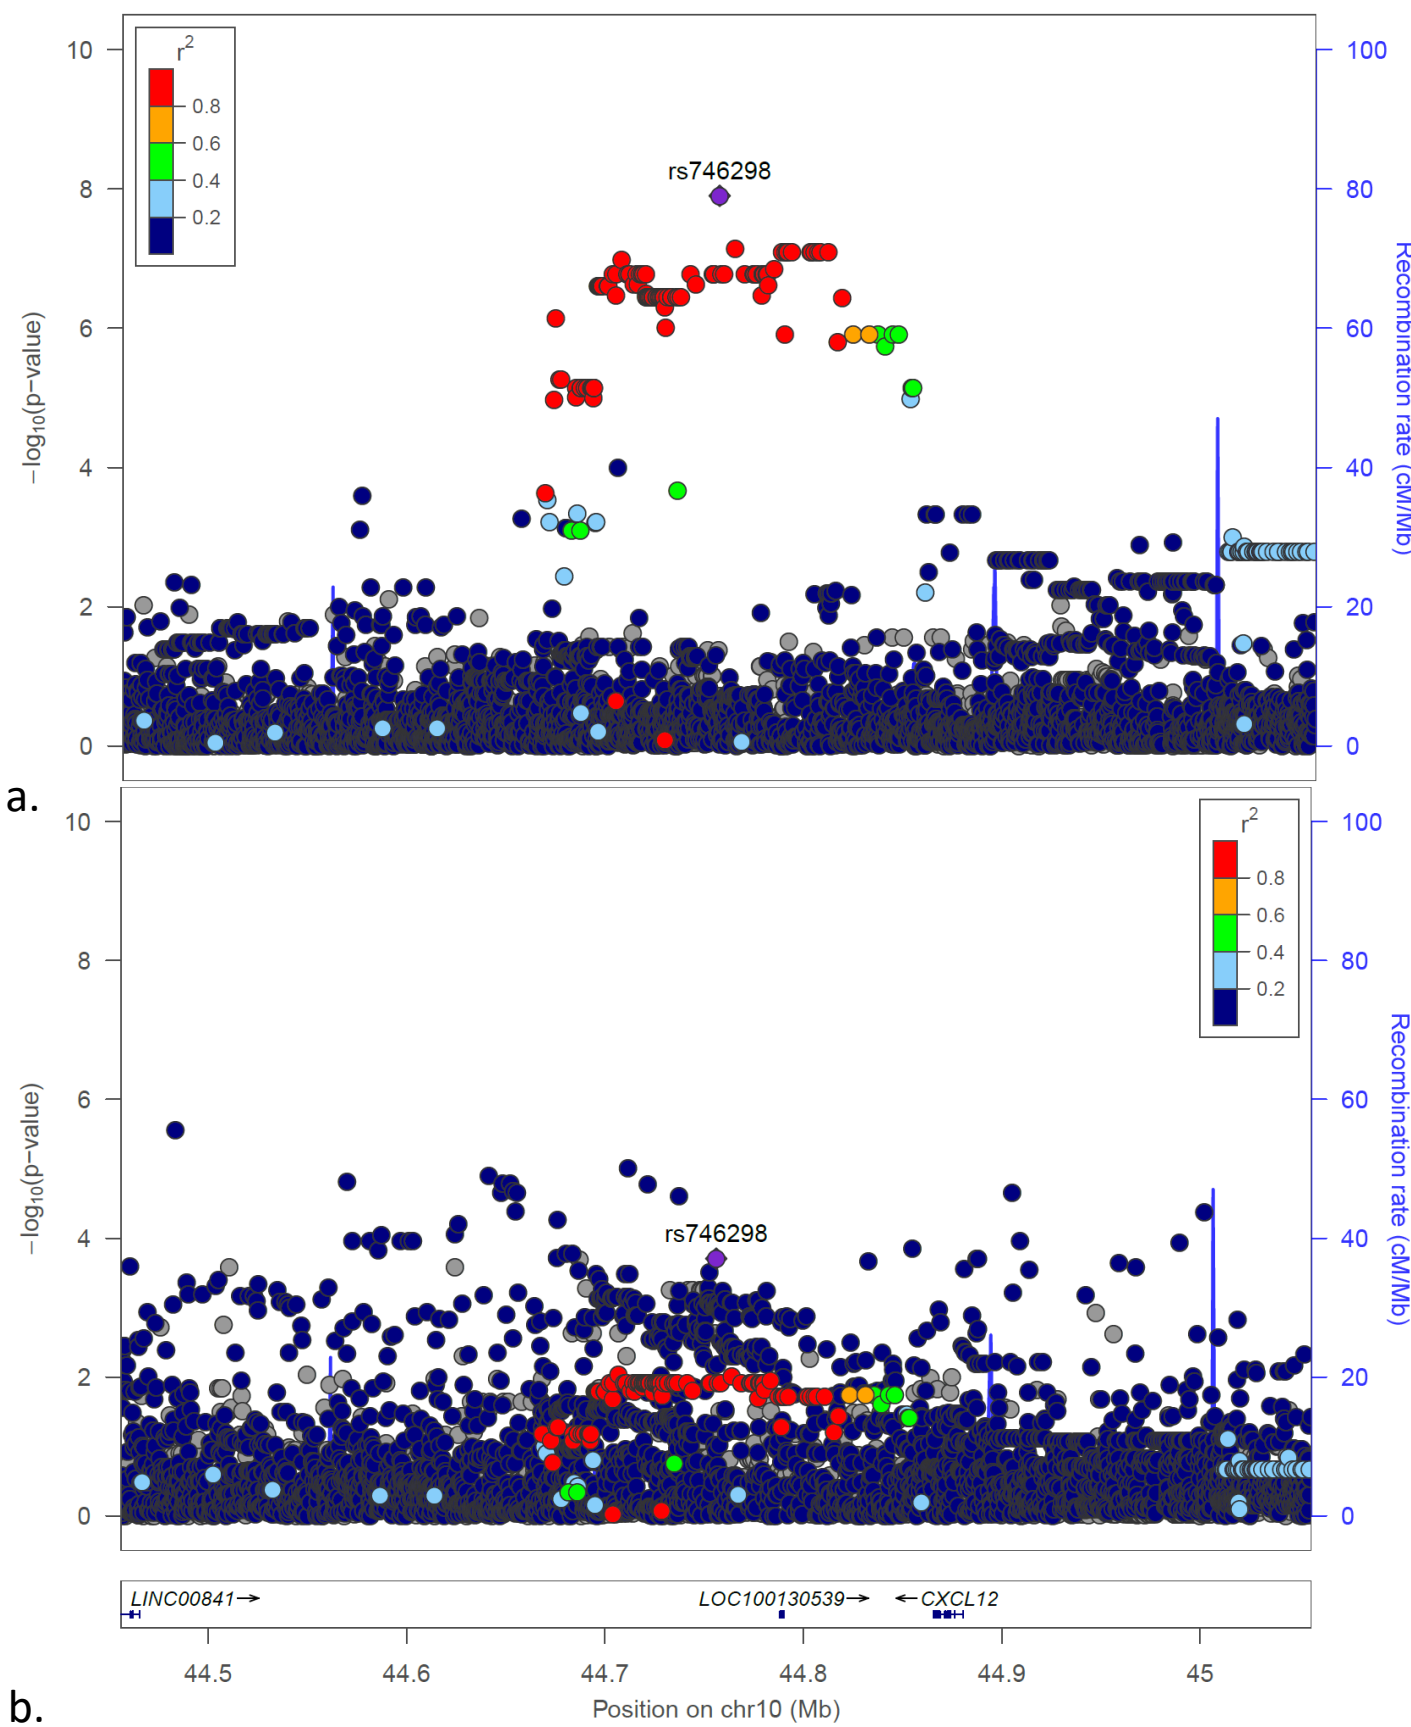

**Supplementary Figure 5.** The LocusZoom plots for the *LINC00841/C10orf142* locus (rs746298). (a) The plot of the association tests of T1D patients with low T1D PRS compared to controls with low T1D PRS; (b) The plot of the association tests of all T1D patients compared to all controls.

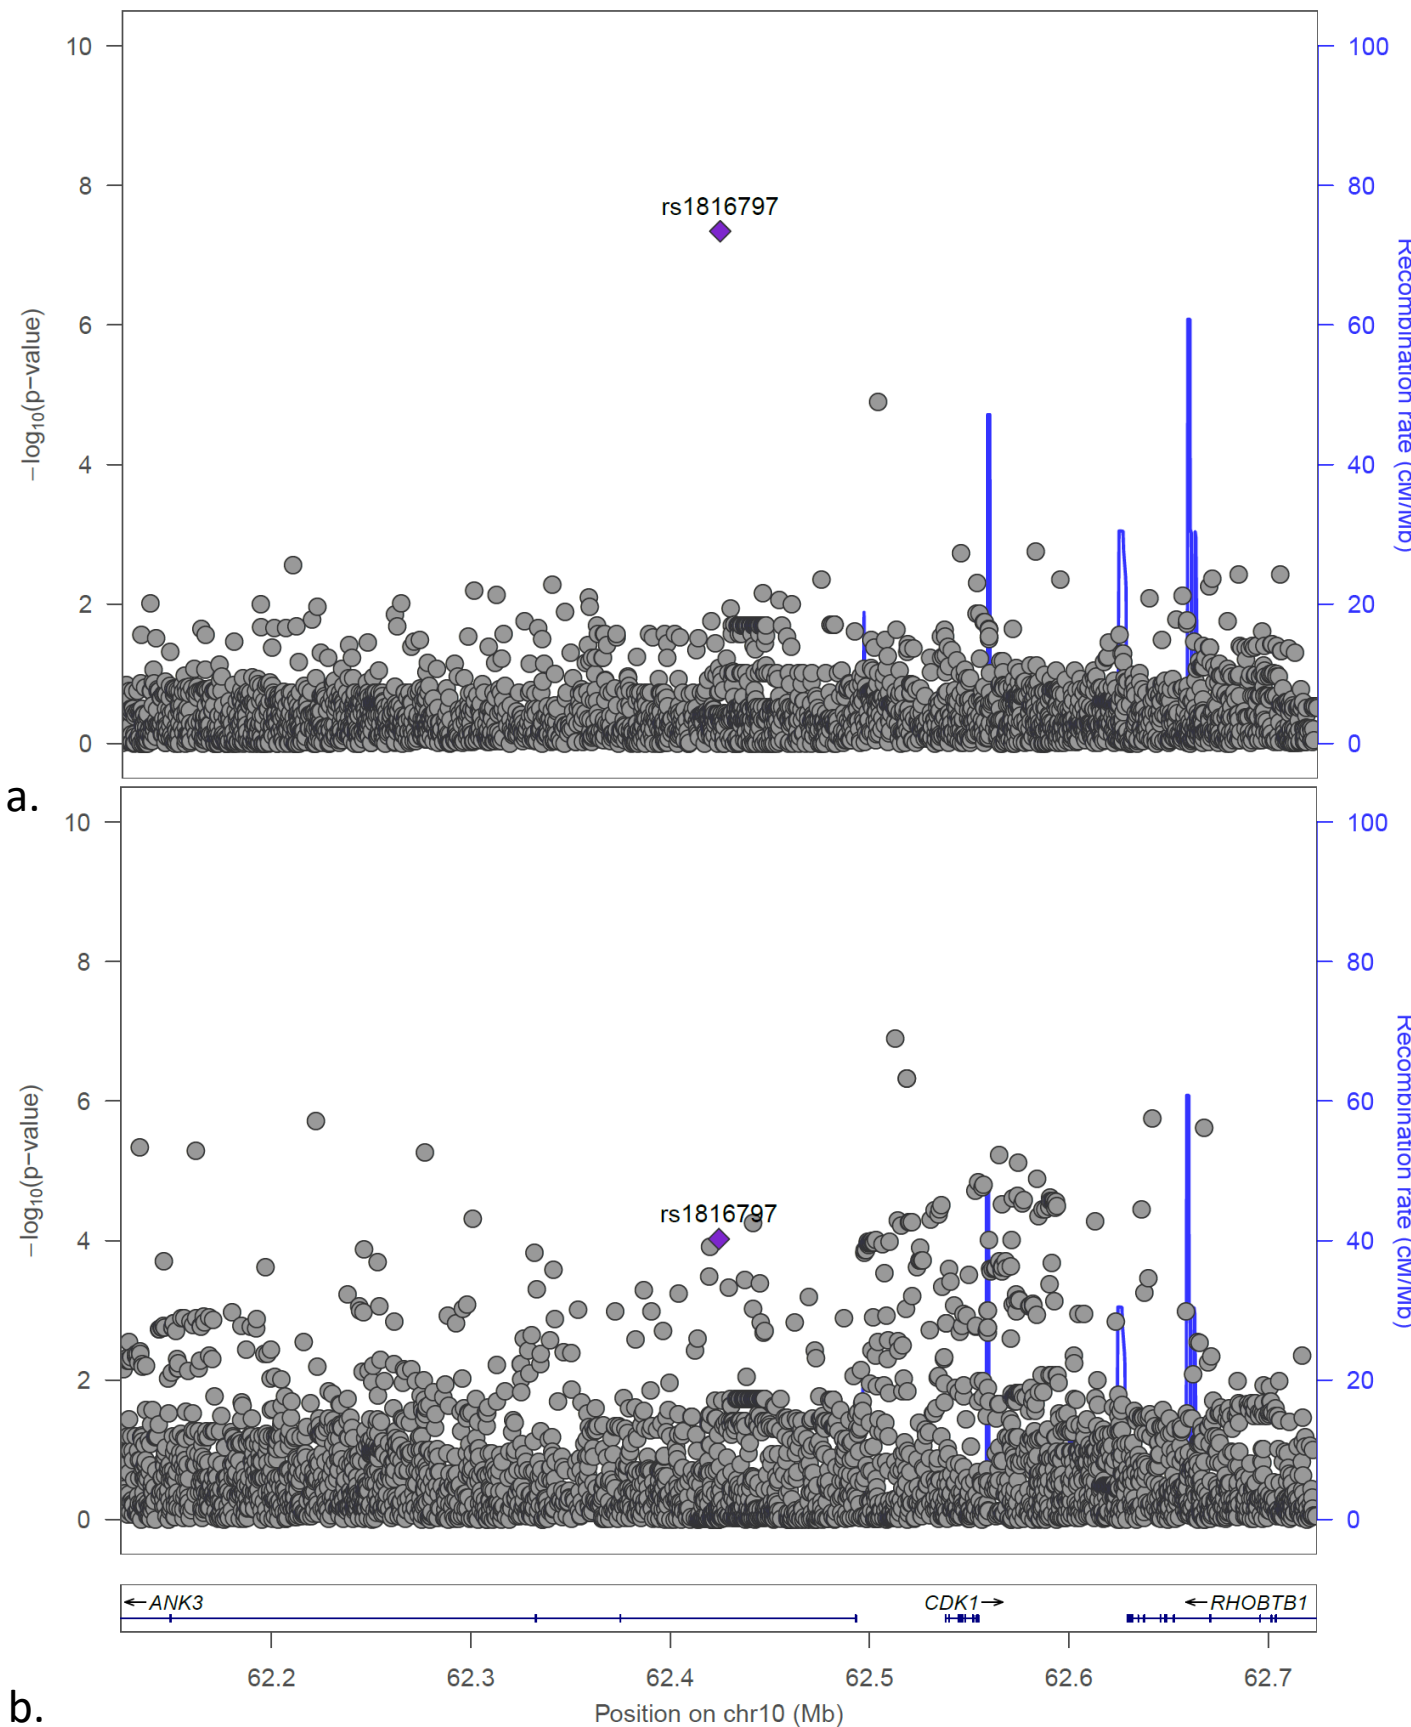

**Supplementary Figure 6.** The LocusZoom plots for the ANK3 locus (rs1816797). (a) The plot of the association tests of T1D patients with low T1D PRS compared to controls with low T1D PRS; (b) The plot of the association tests of all T1D patients compared to all controls.

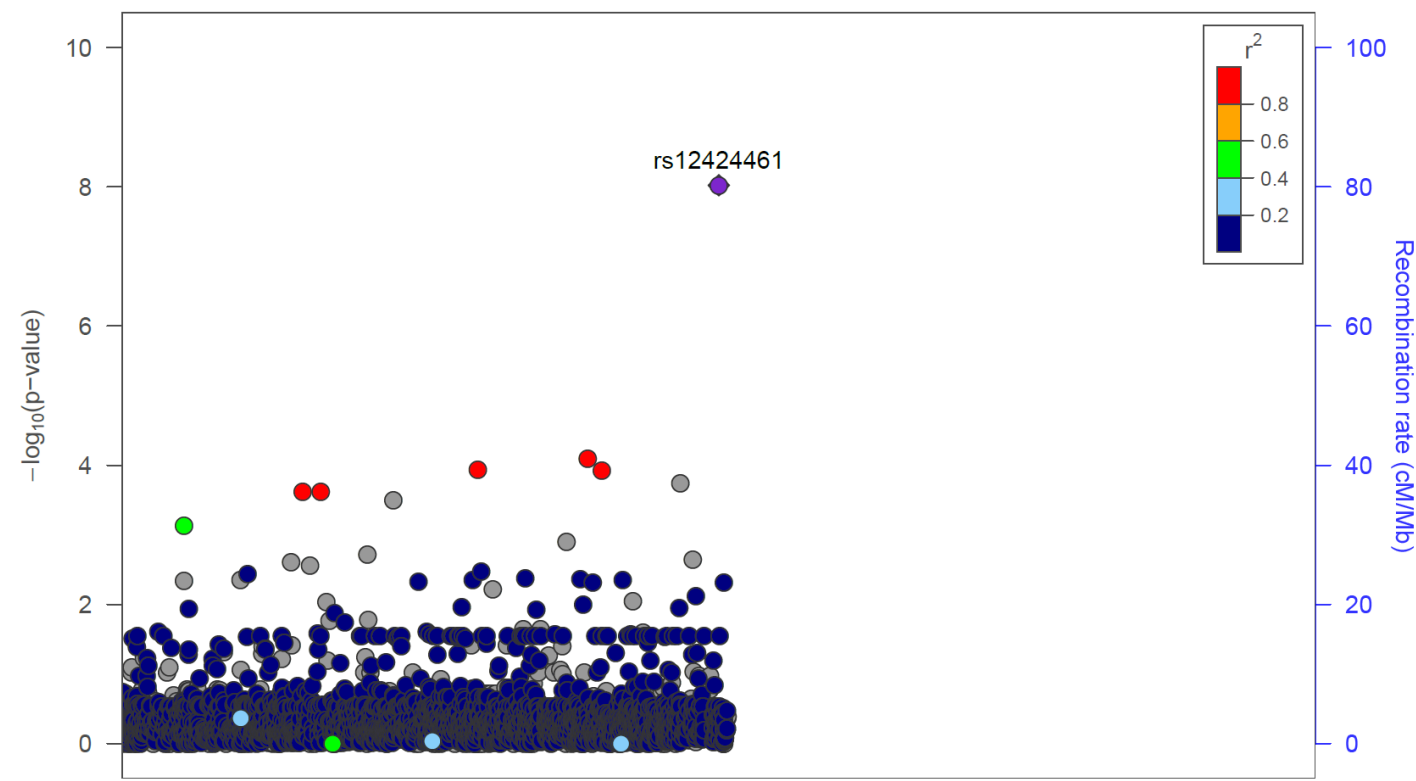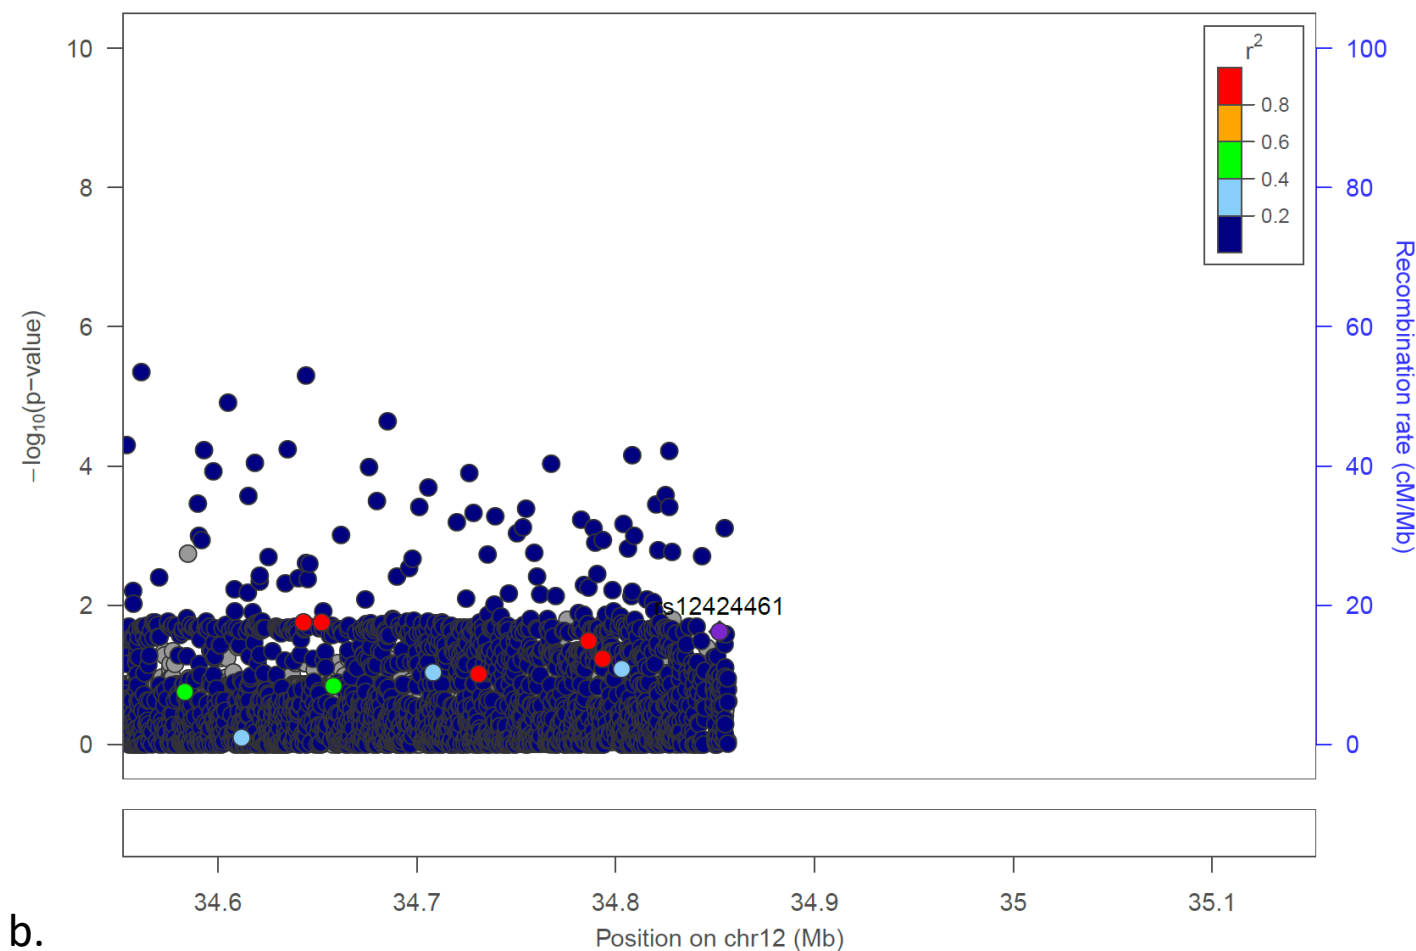

**Supplementary Figure 7.** The LocusZoom plots for the *ALG10* locus (rs12424461). (a) The plot of the association tests of T1D patients with low T1D PRS compared to controls with low T1D PRS; (b) The plot of the association tests of all T1D patients compared to all controls.



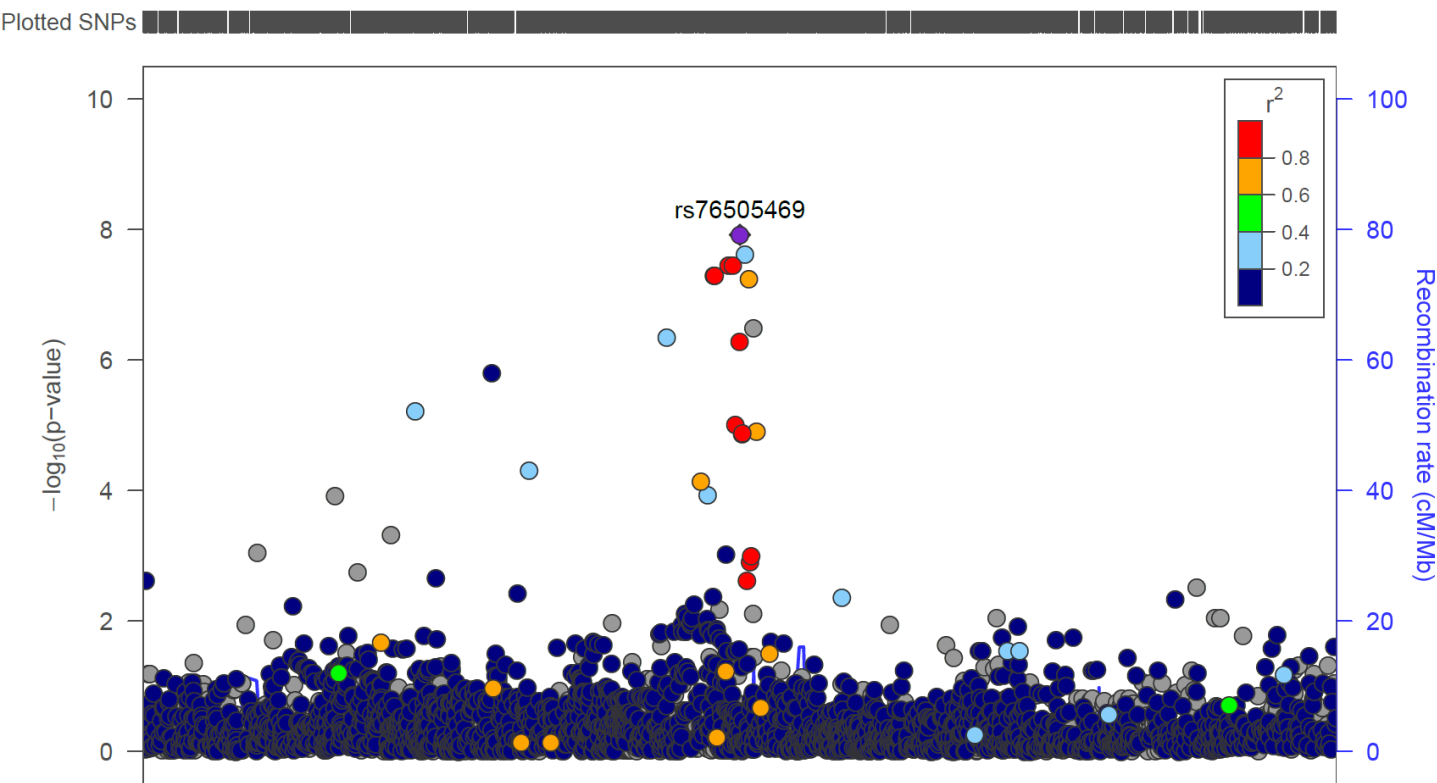

a.

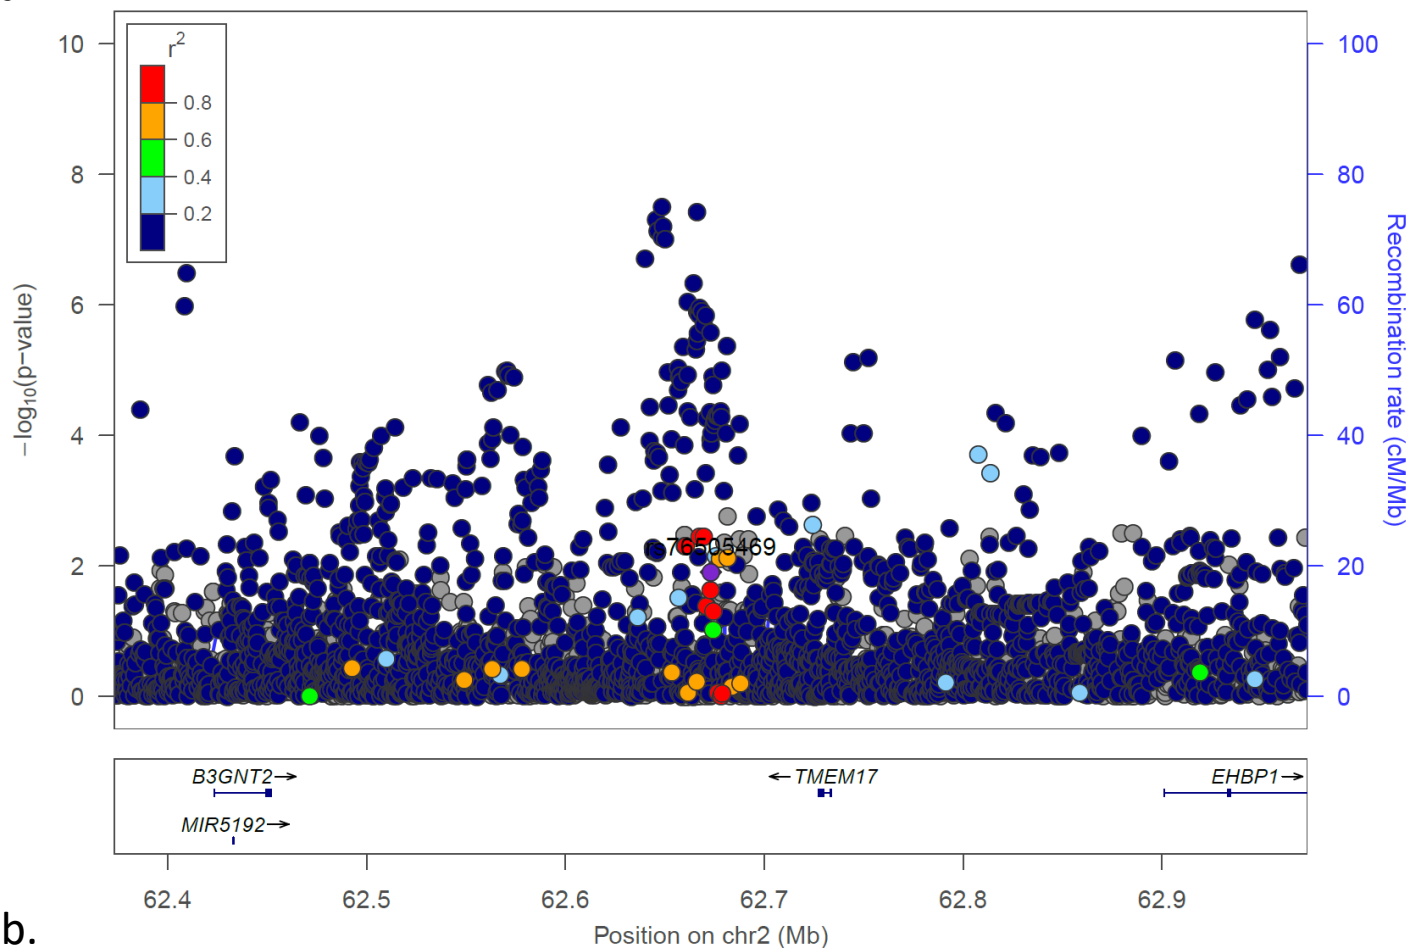

b.

**Supplementary Figure 8.** The LocusZoom plots for the *B3GNT2/TMEM17* locus (rs76505469). (a) The plot of the association tests of T1D patients with low T1D PRS compared to controls with low T1D PRS; (b) The plot of the association tests of all T1D patients compared to all controls.

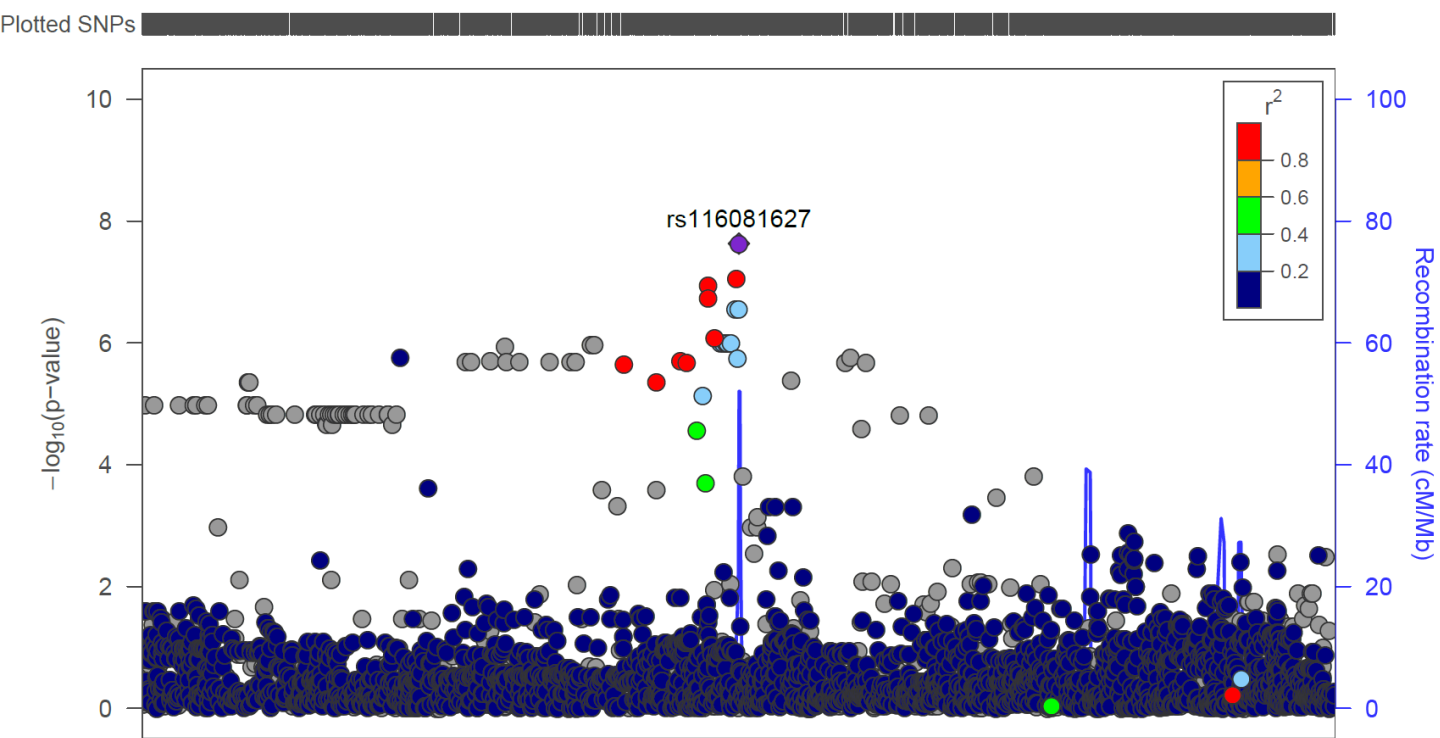

a.

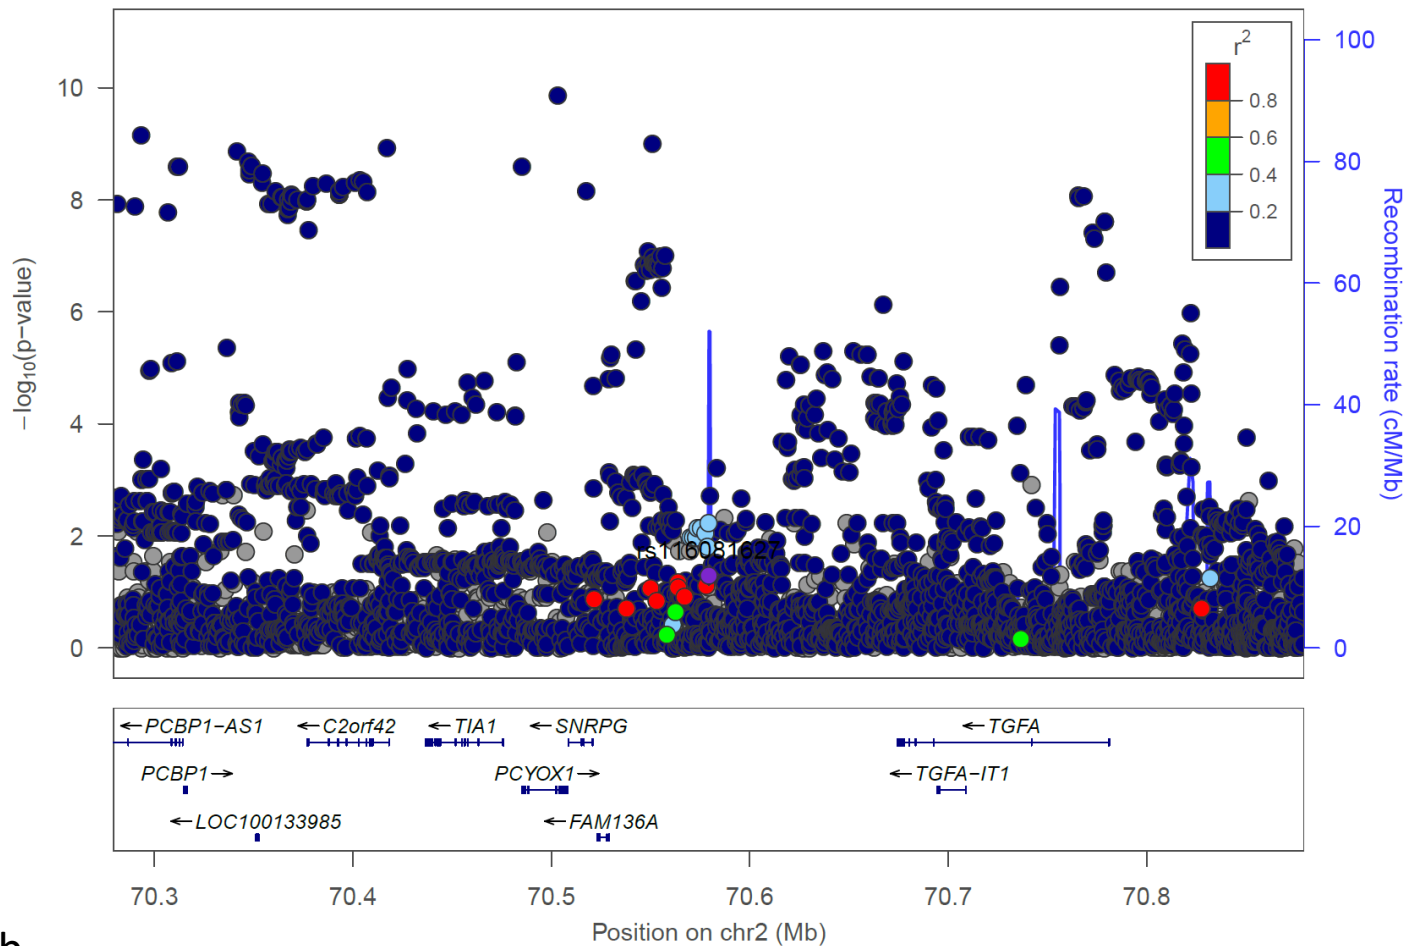

b.

**Supplementary Figure 9.** The LocusZoom plots for the *FAM136A/TGFA* locus (rs116081627). (a) The plot of the association tests of T1D patients with low T1D PRS compared to controls with low T1D PRS; (b) The plot of the association tests of all T1D patients compared to all controls.



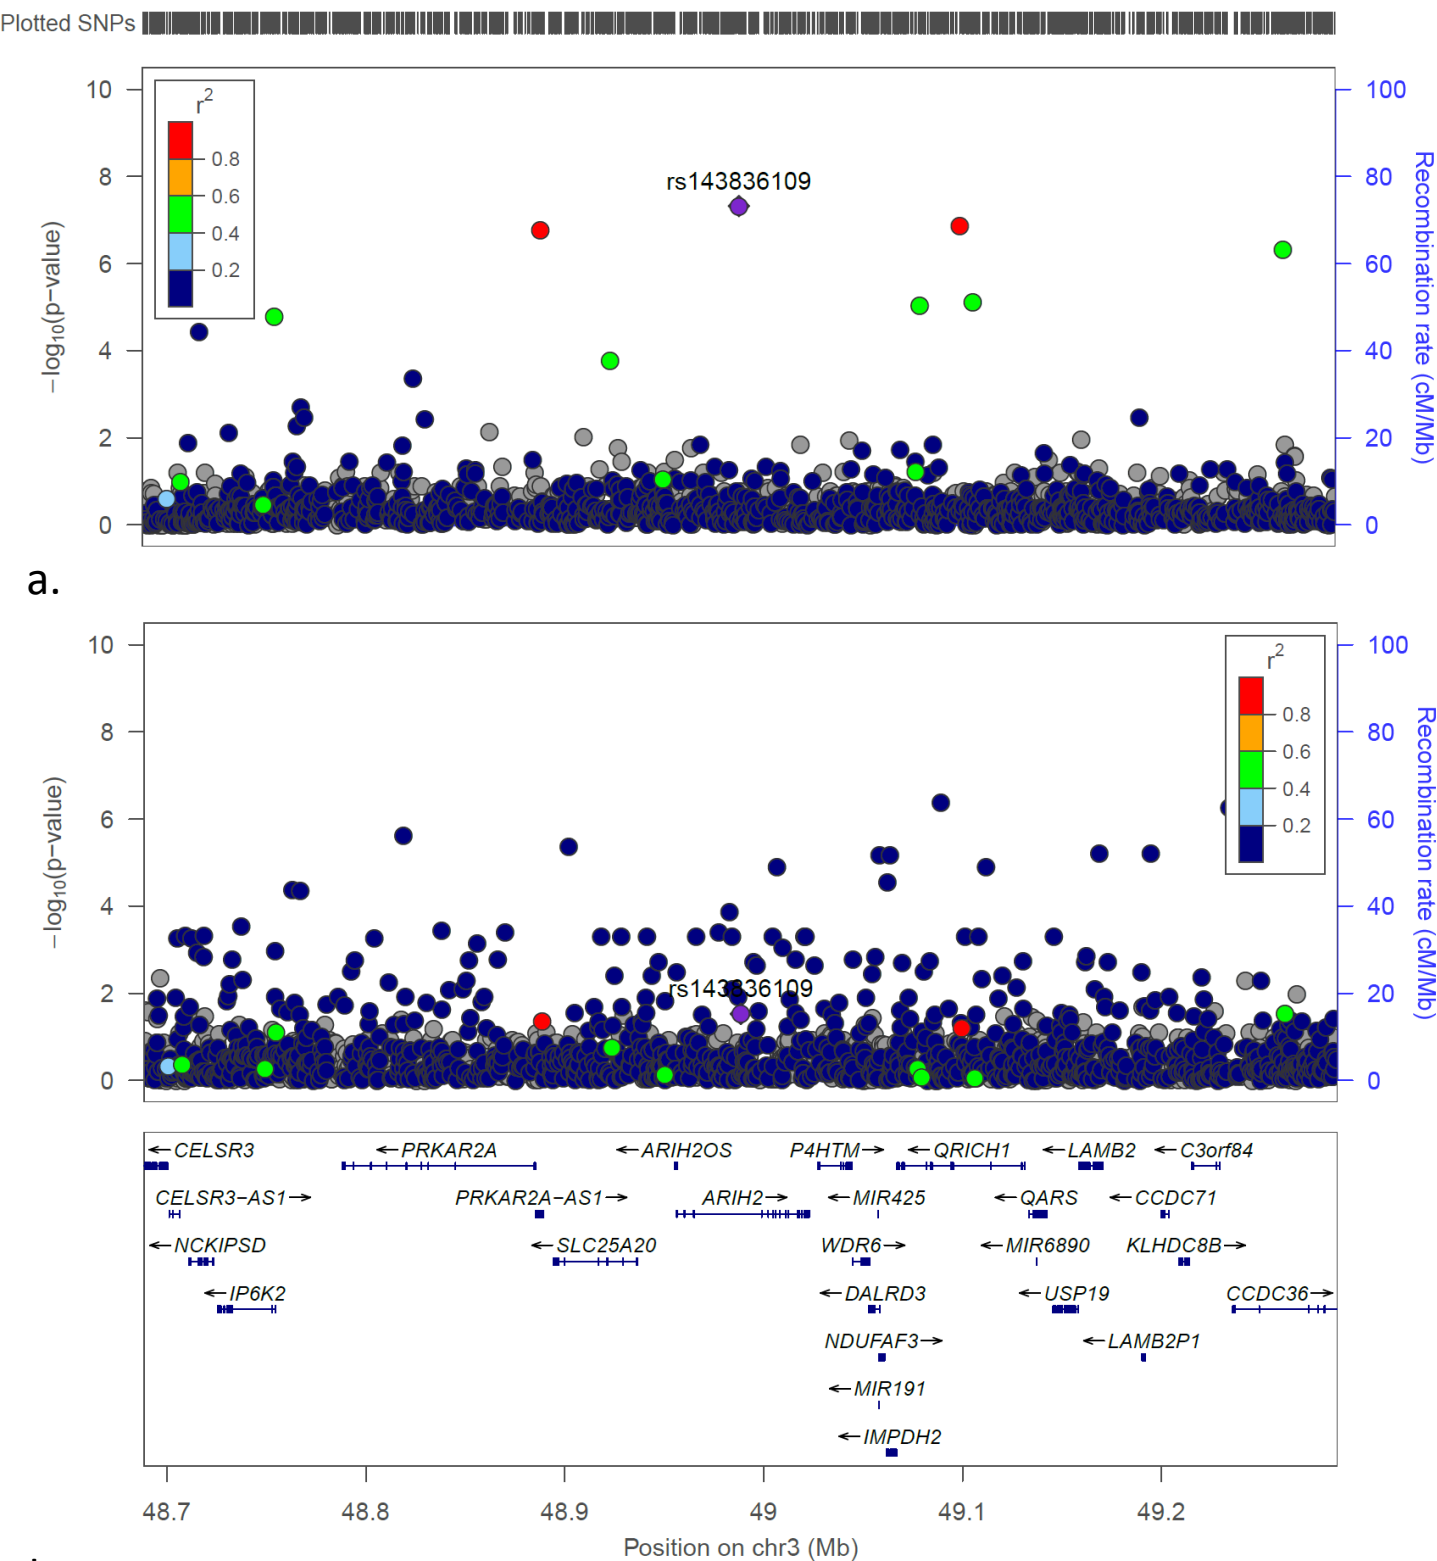

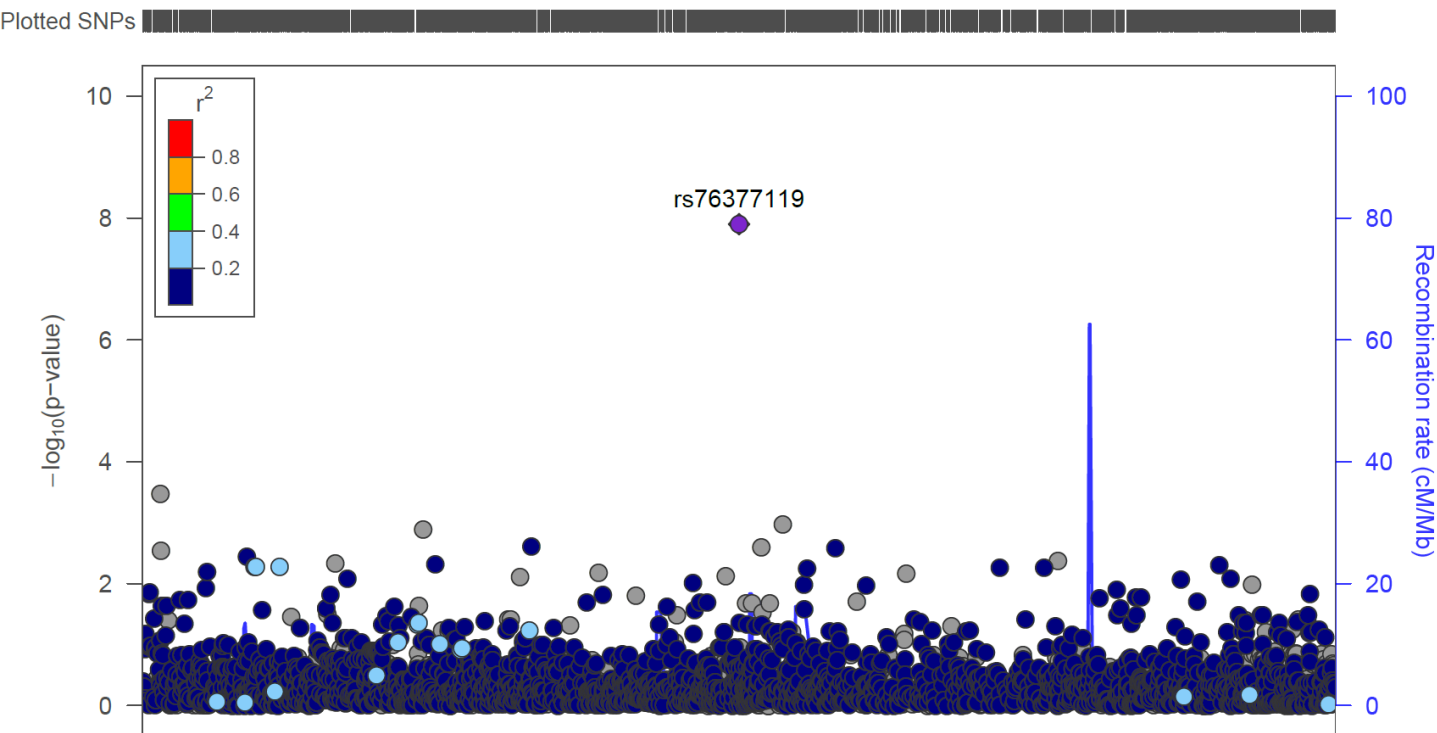

a.

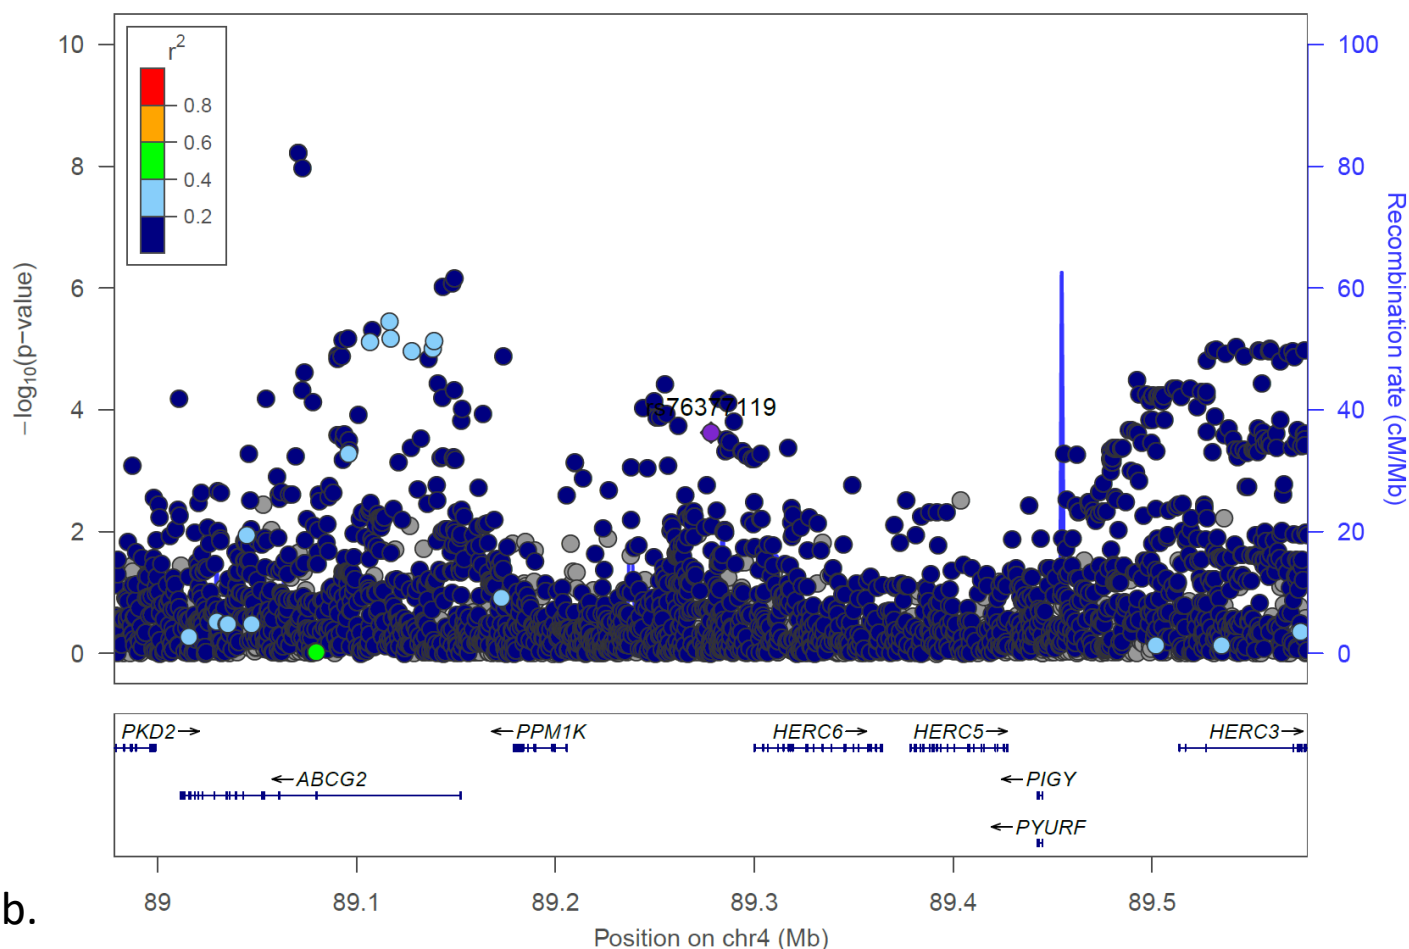

b.

**Supplementary Figure 11.** The LocusZoom plots for the *LOC105369192/HERC6* locus (rs76377119). (a) The plot of the association tests of T1D patients with low T1D PRS compared to controls with low T1D PRS; (b) The plot of the association tests of all T1D patients compared to all controls.

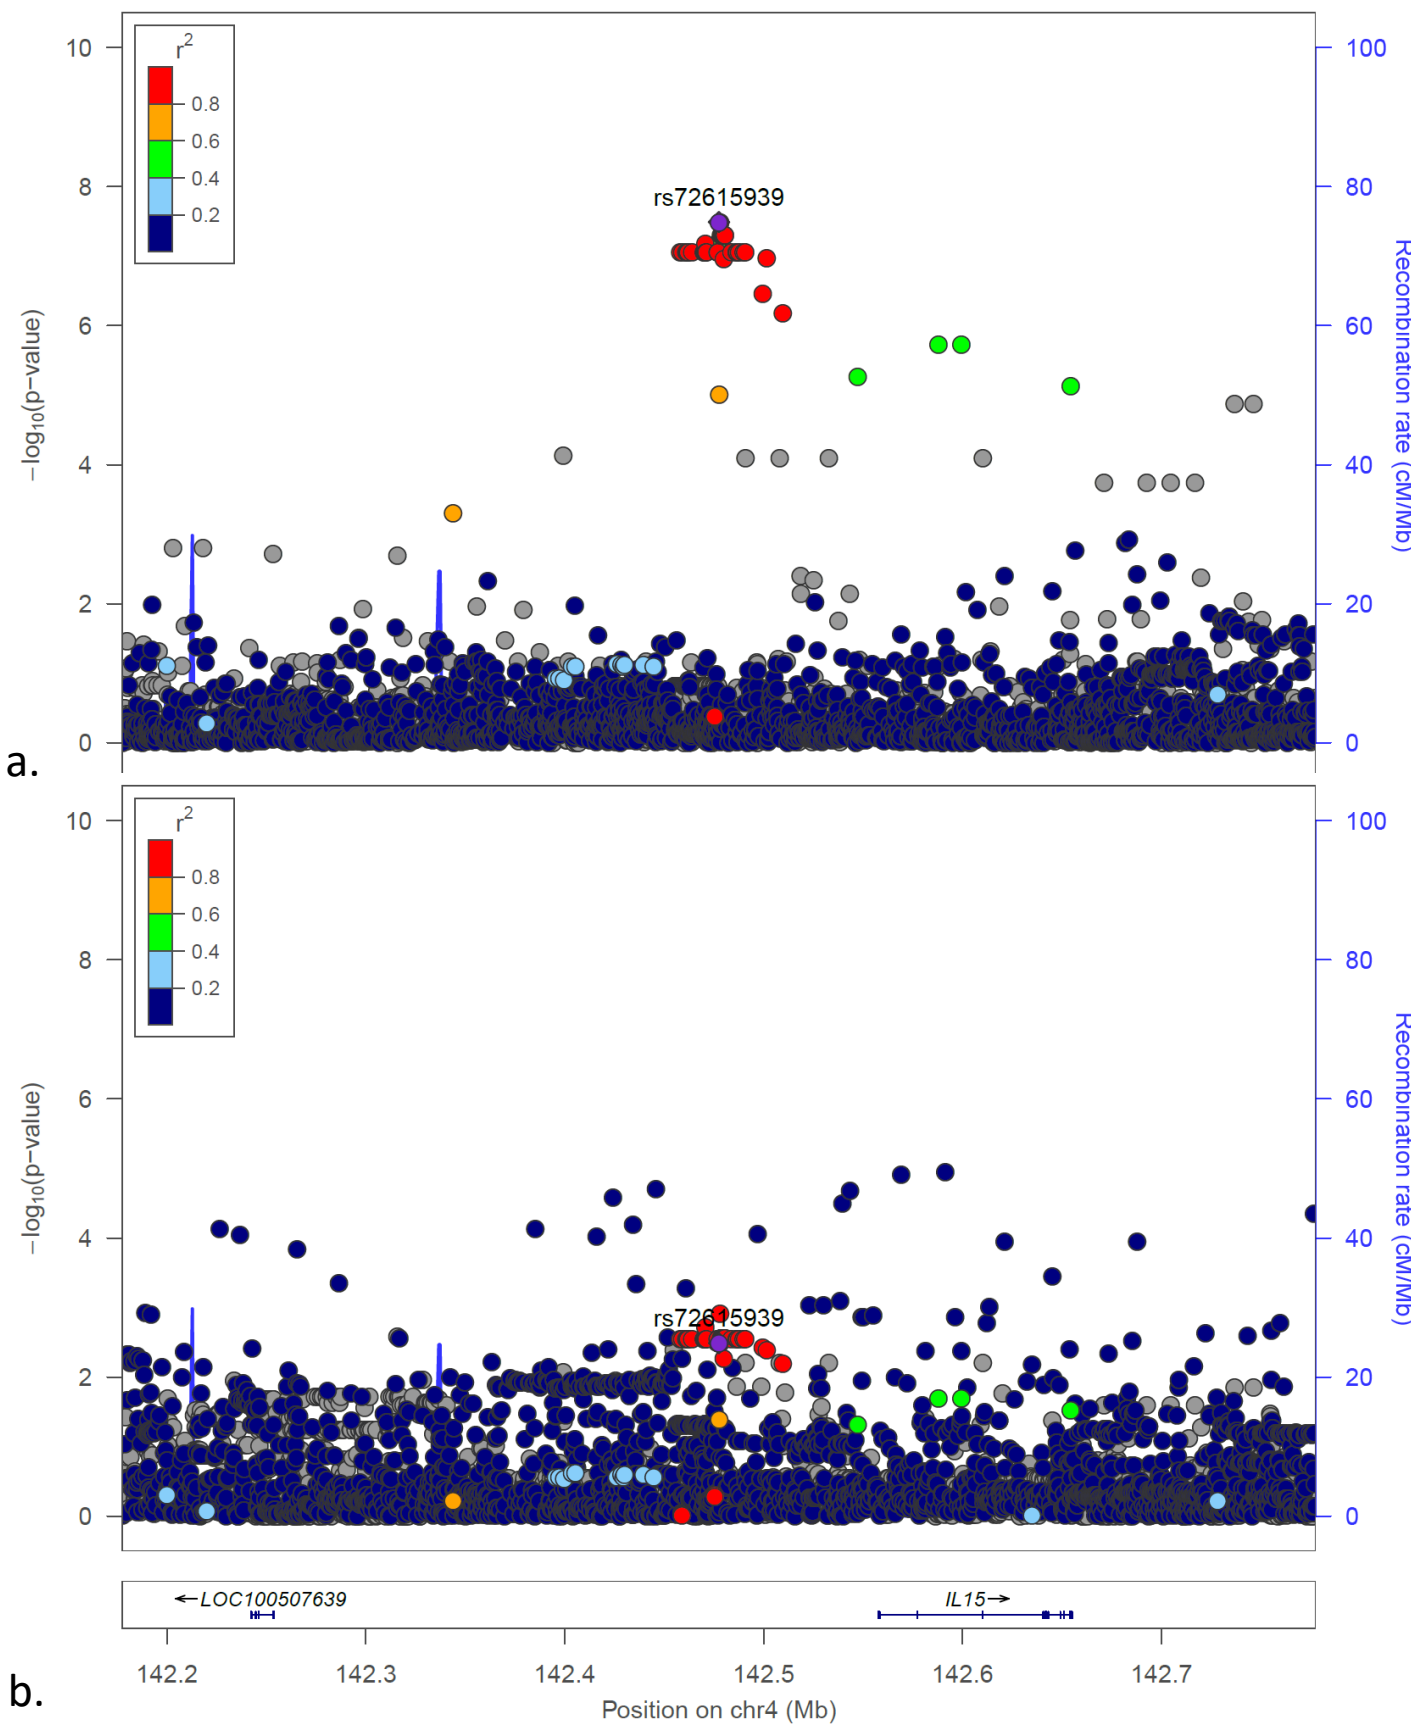

**Supplementary Figure 12.** The LocusZoom plots for the *LINC02432/IL15* locus (rs72615939). (a) The plot of the association tests of T1D patients with low T1D PRS compared to controls with low T1D PRS; (b) The plot of the association tests of all T1D patients compared to all controls.

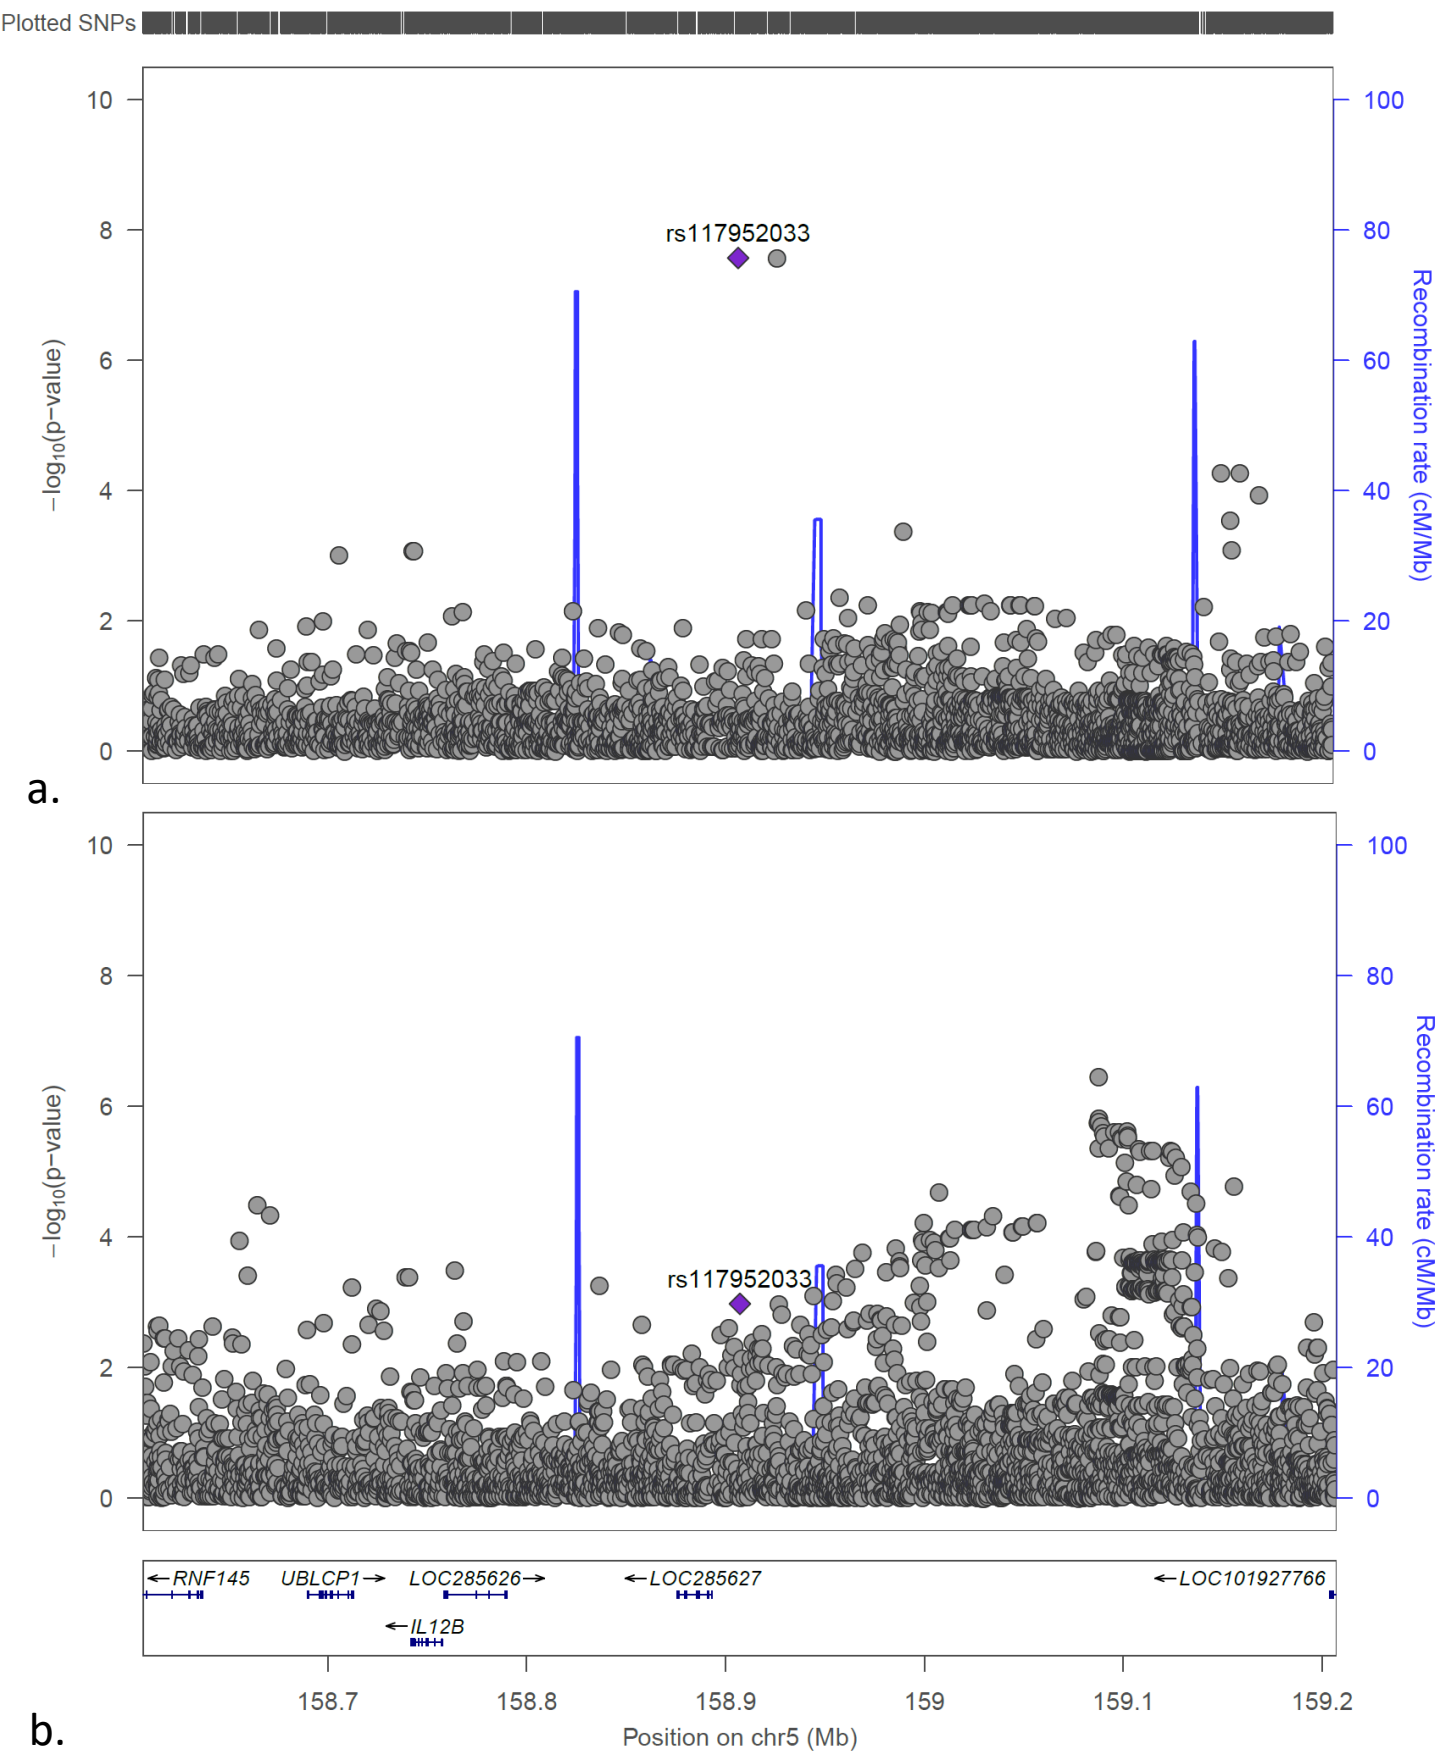

**Supplementary Figure 13.** The LocusZoom plots for the *LINC01845/LINC01847* locus (rs117952033). (a) The plot of the association tests of T1D patients with low T1D PRS compared to controls with low T1D PRS; (b) The plot of the association tests of all T1D patients compared to all controls.

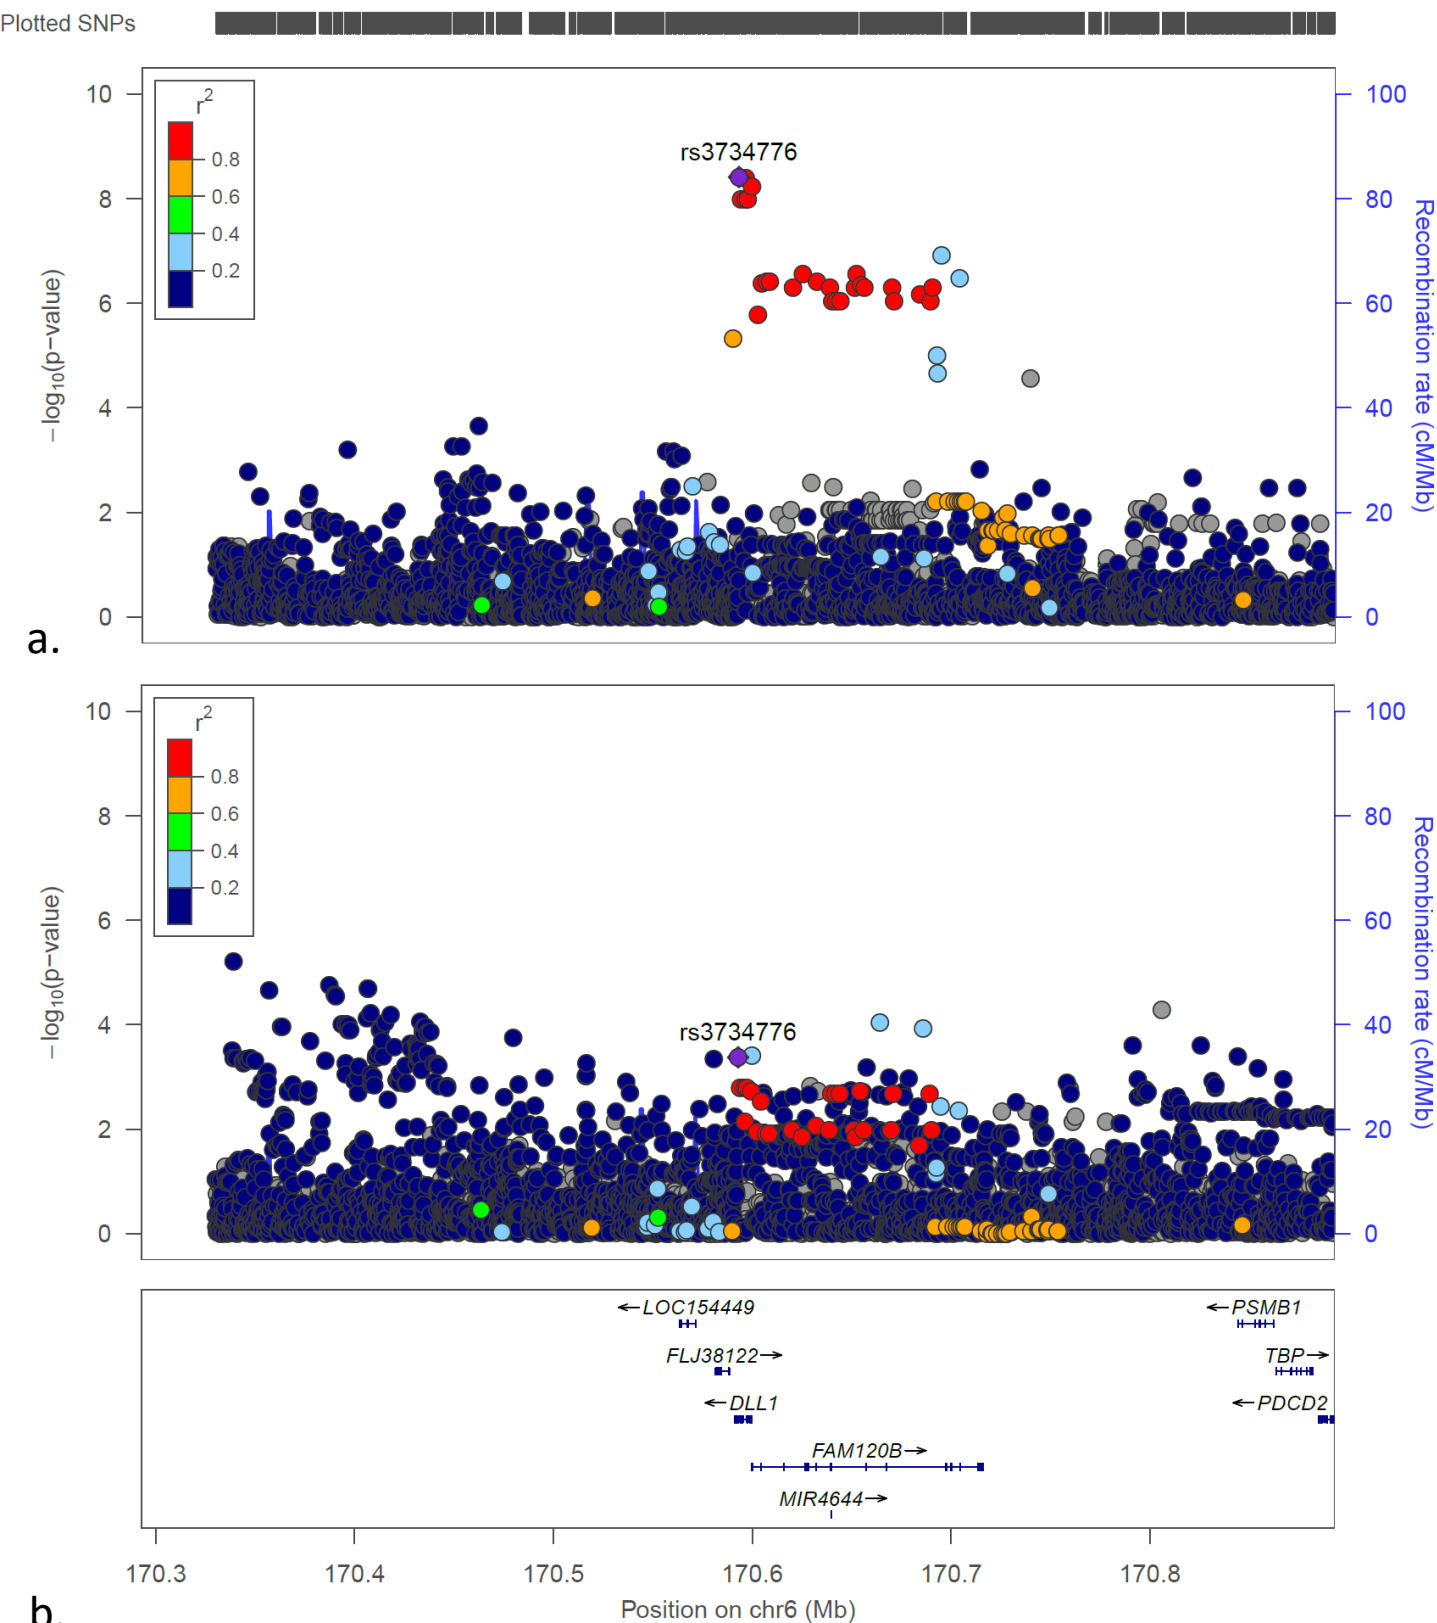

**Supplementary Figure 14.** The LocusZoom plots for the *DLL1* locus (rs3734776). (a) The plot of the association tests of T1D patients with low T1D PRS compared to controls with low T1D PRS; (b) The plot of the association tests of all T1D patients compared to all controls.



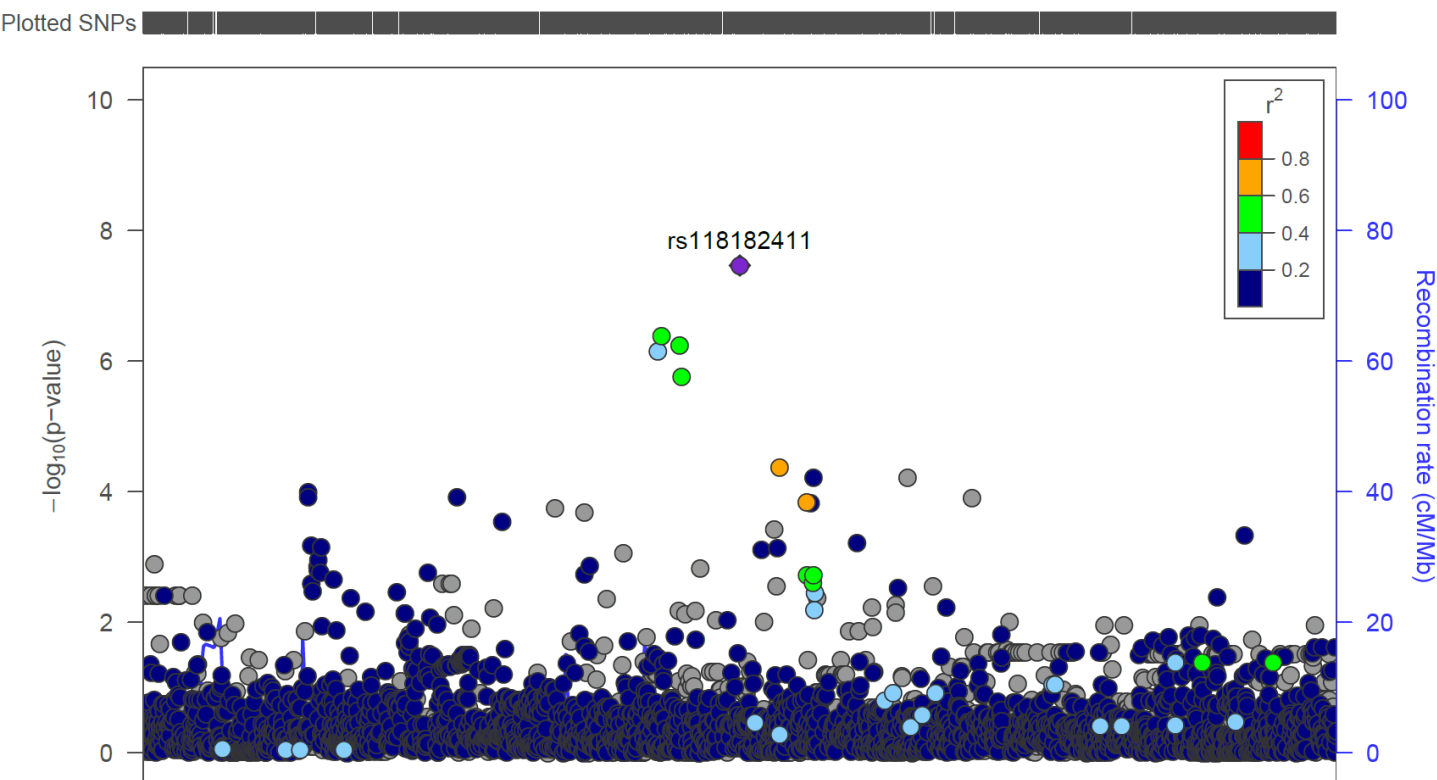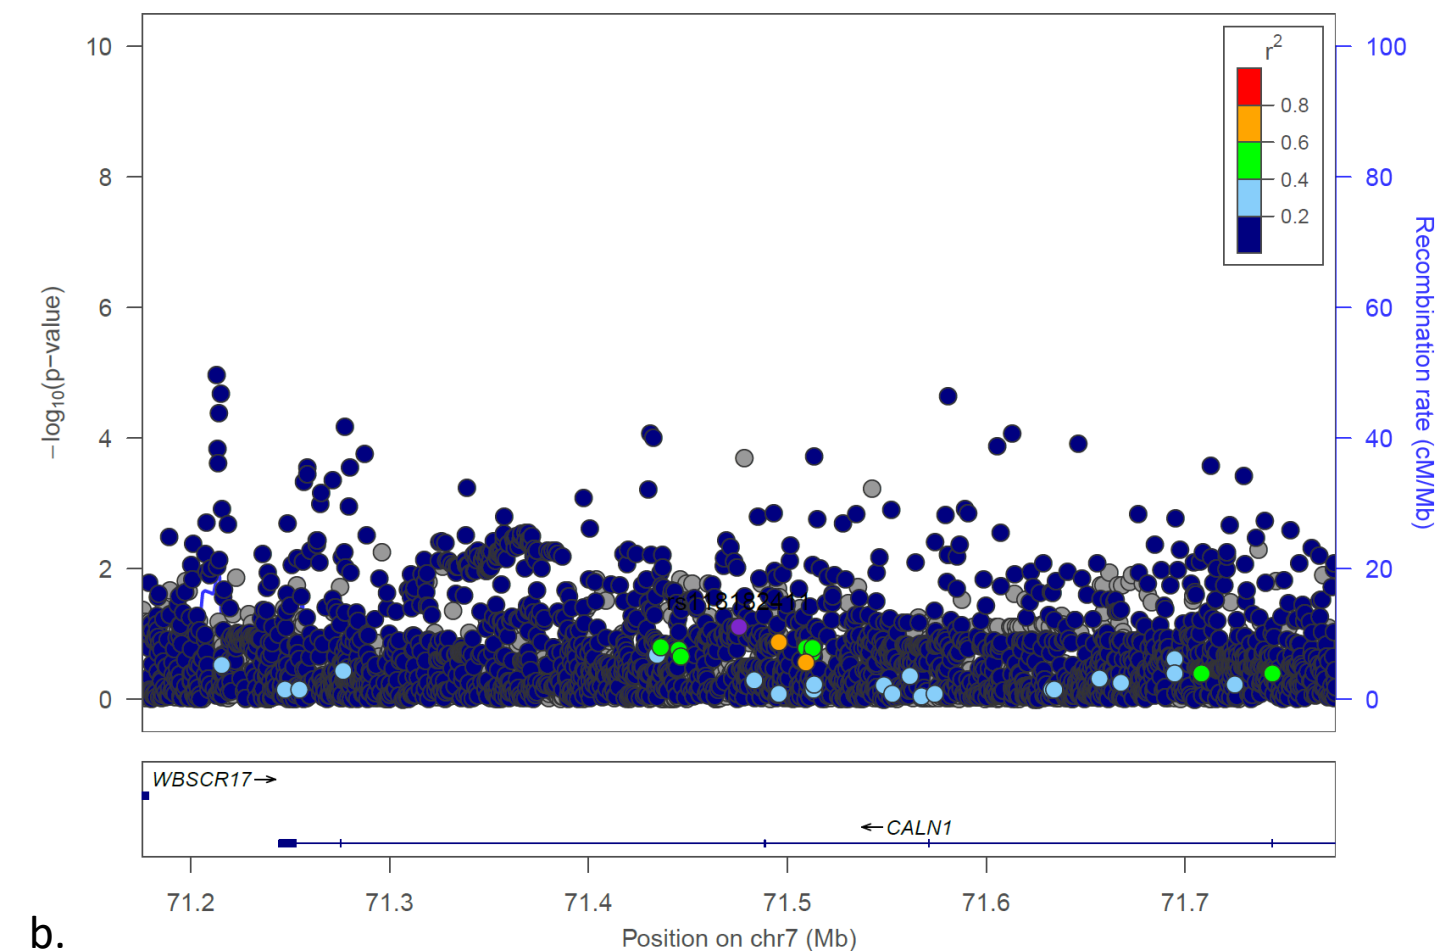

**Supplementary Figure 15.** The LocusZoom plots for the *CALN1* locus (rs118182411). (a) The plot of the association tests of T1D patients with low T1D PRS compared to controls with low T1D PRS; (b) The plot of the association tests of all T1D patients compared to all controls.



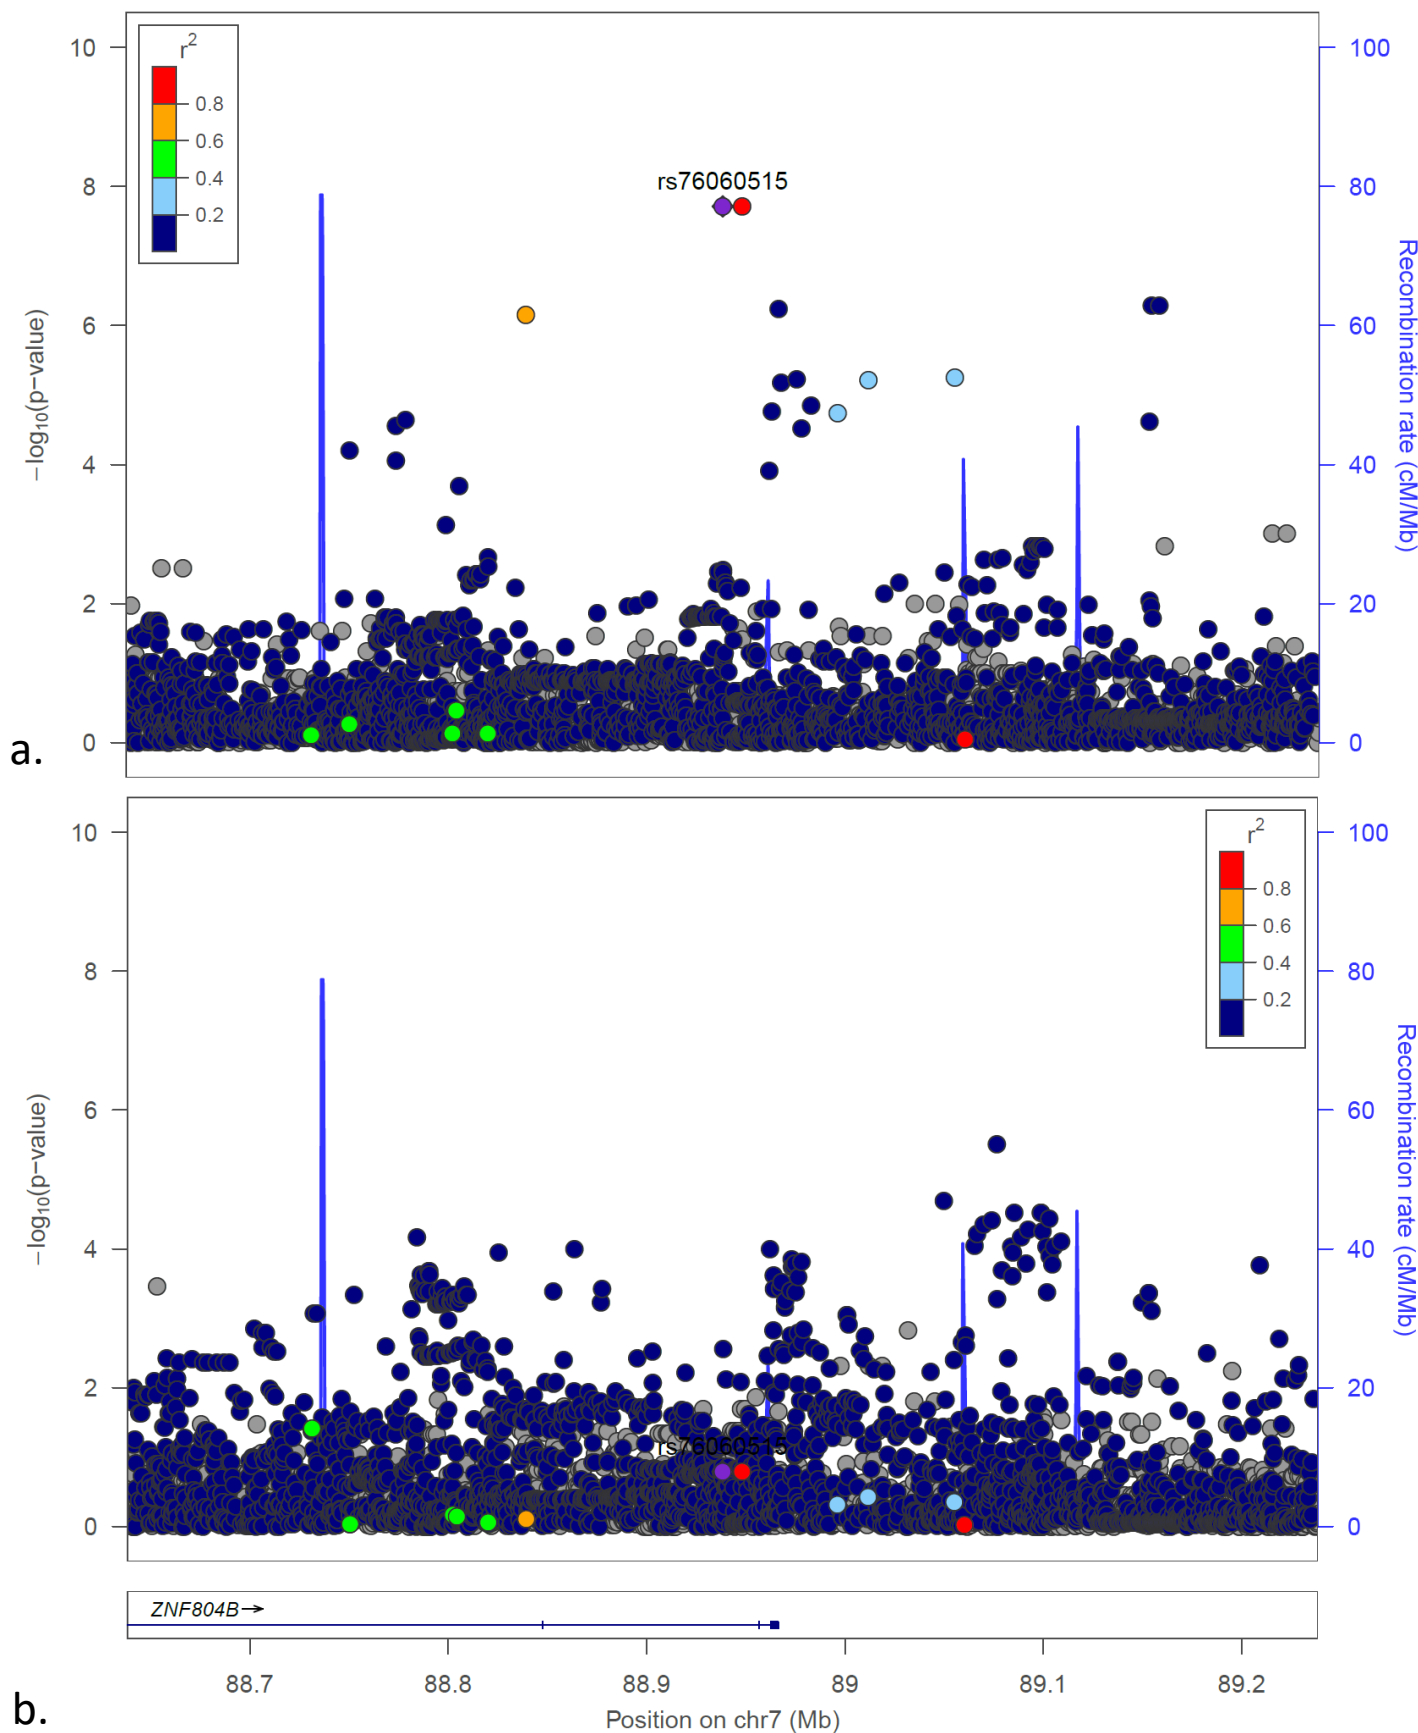

**Supplementary Figure 16.** The LocusZoom plots for the *ZNF804B* locus (rs76060515). (a) The plot of the association tests of T1D patients with low T1D PRS compared to controls with low T1D PRS; (b) The plot of the association tests of all T1D patients compared to all controls.

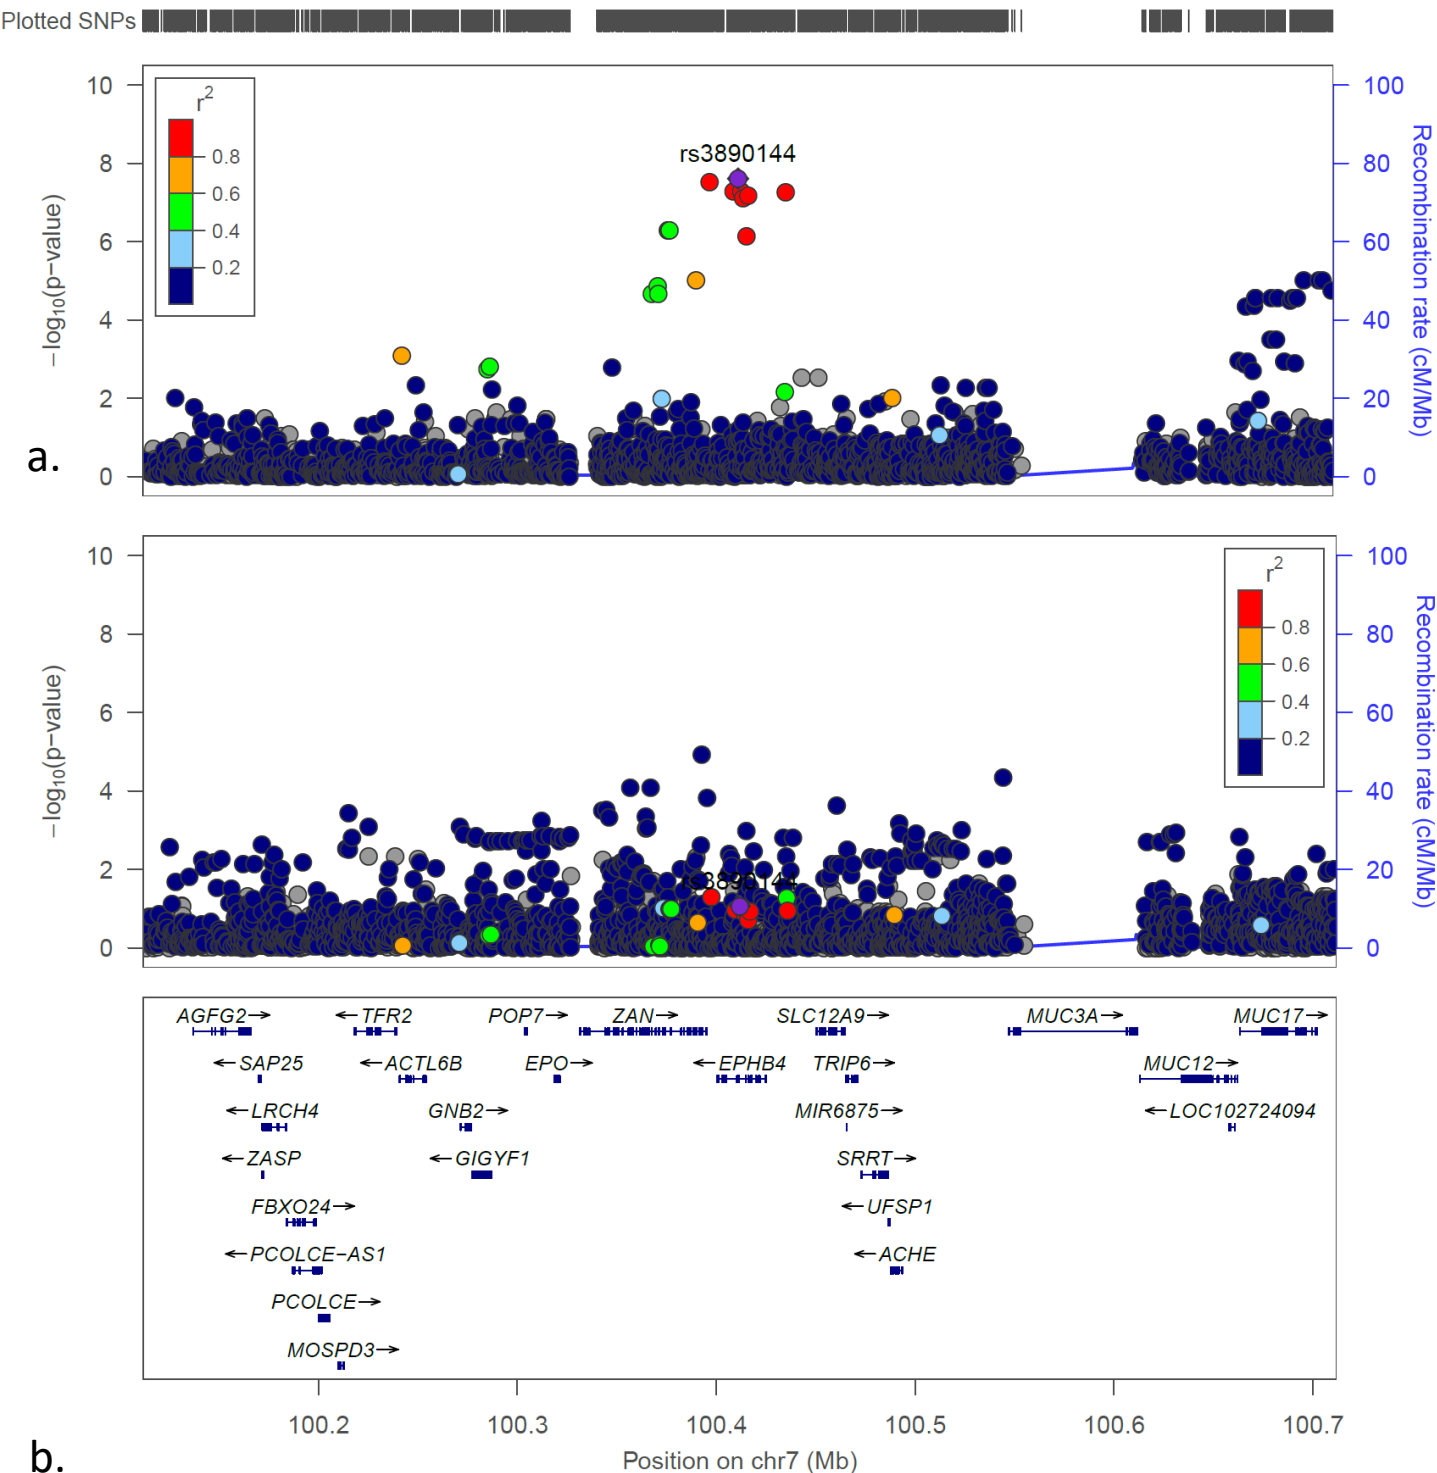

**Supplementary Figure 17.** The LocusZoom plots for the *EPHB4* locus (rs3890144). (a) The plot of the association tests of T1D patients with low T1D PRS compared to controls with low T1D PRS; (b) The plot of the association tests of all T1D patients compared to all controls.

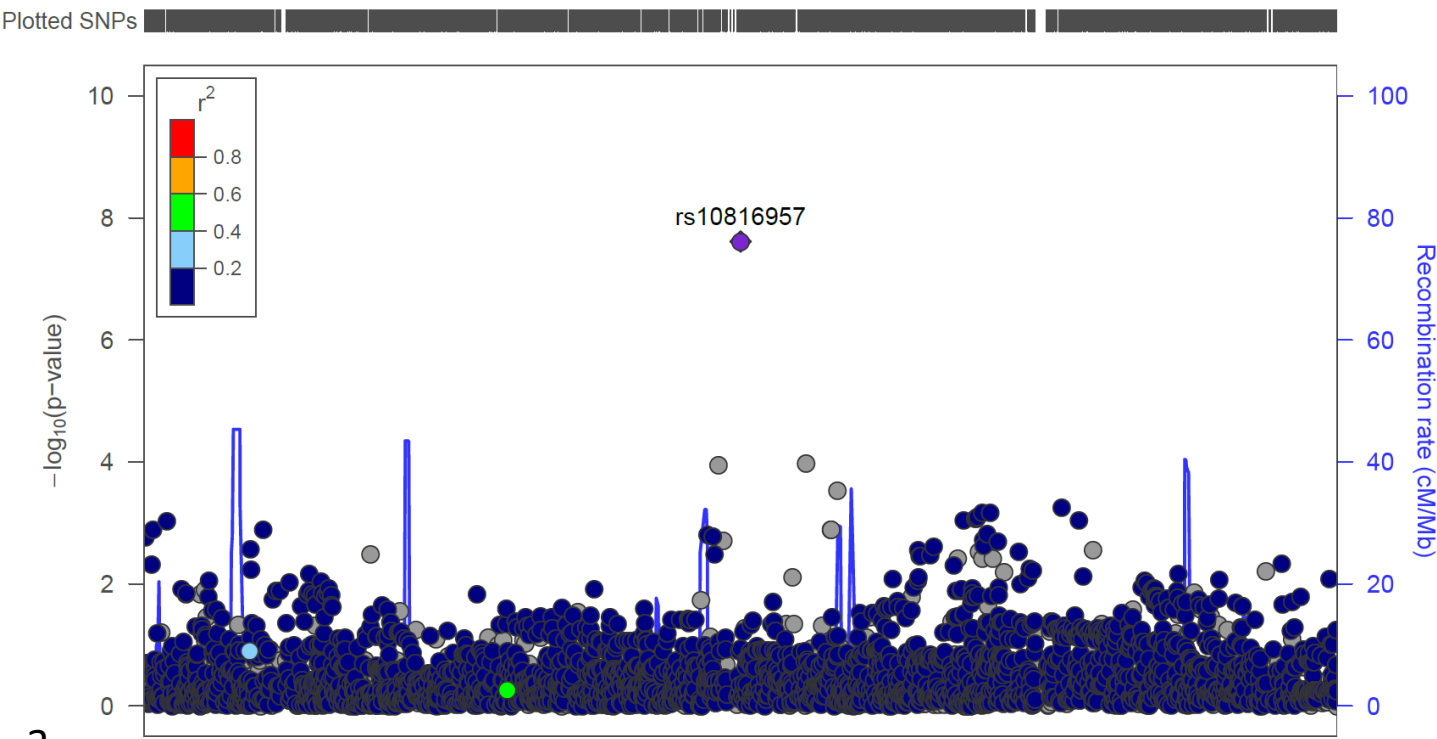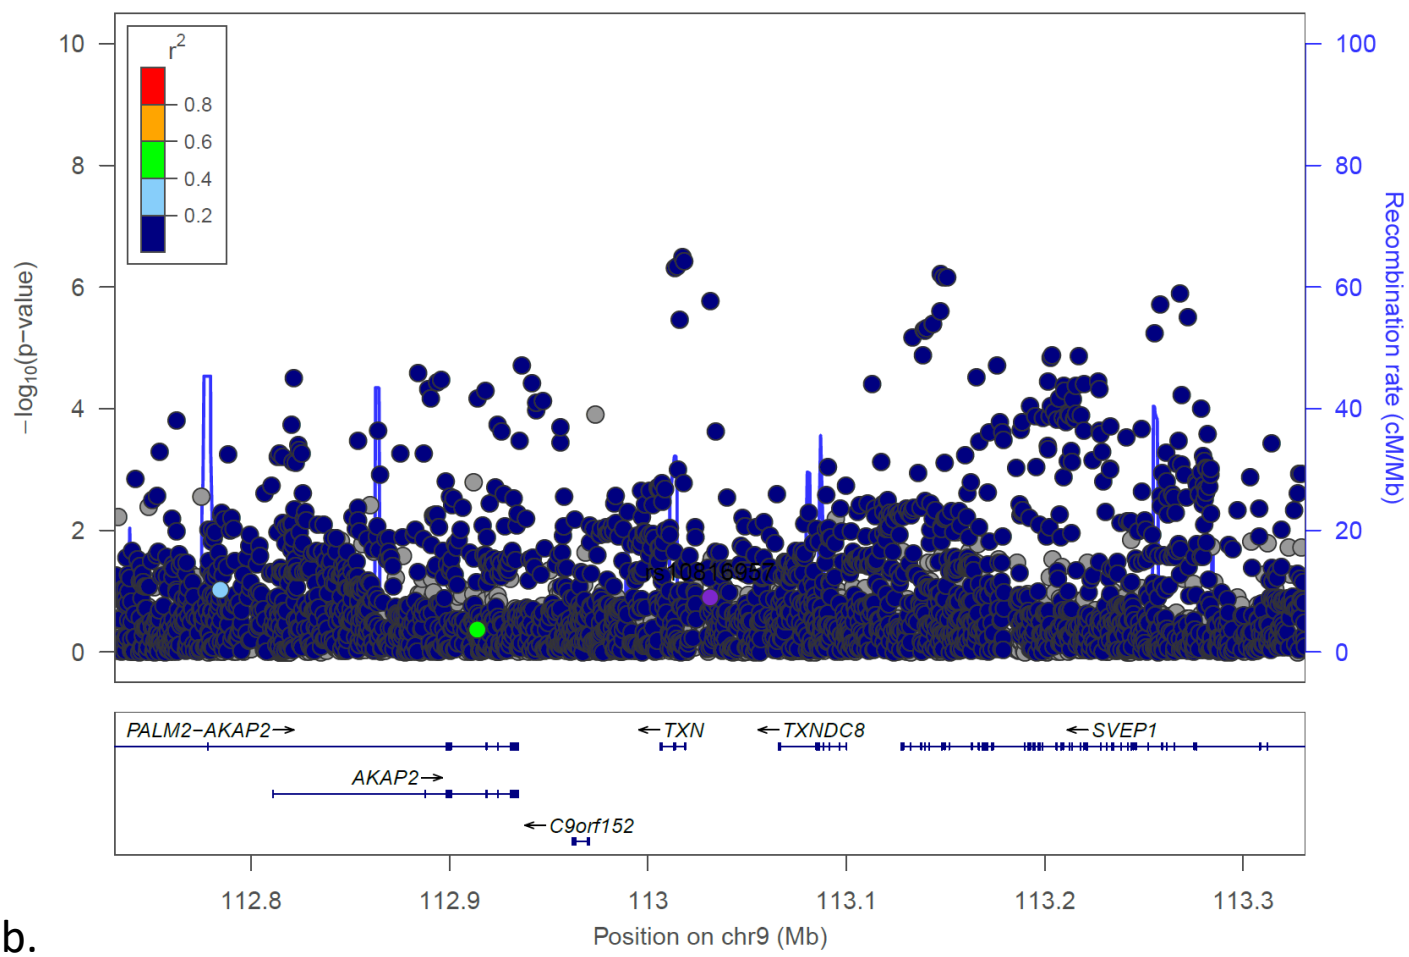

**Supplementary Figure 18.** The LocusZoom plots for the *TXN/TXNDC8* locus (rs10816957). (a) The plot of the association tests of T1D patients with low T1D PRS compared to controls with low T1D PRS; (b) The plot of the association tests of all T1D patients compared to all controls.

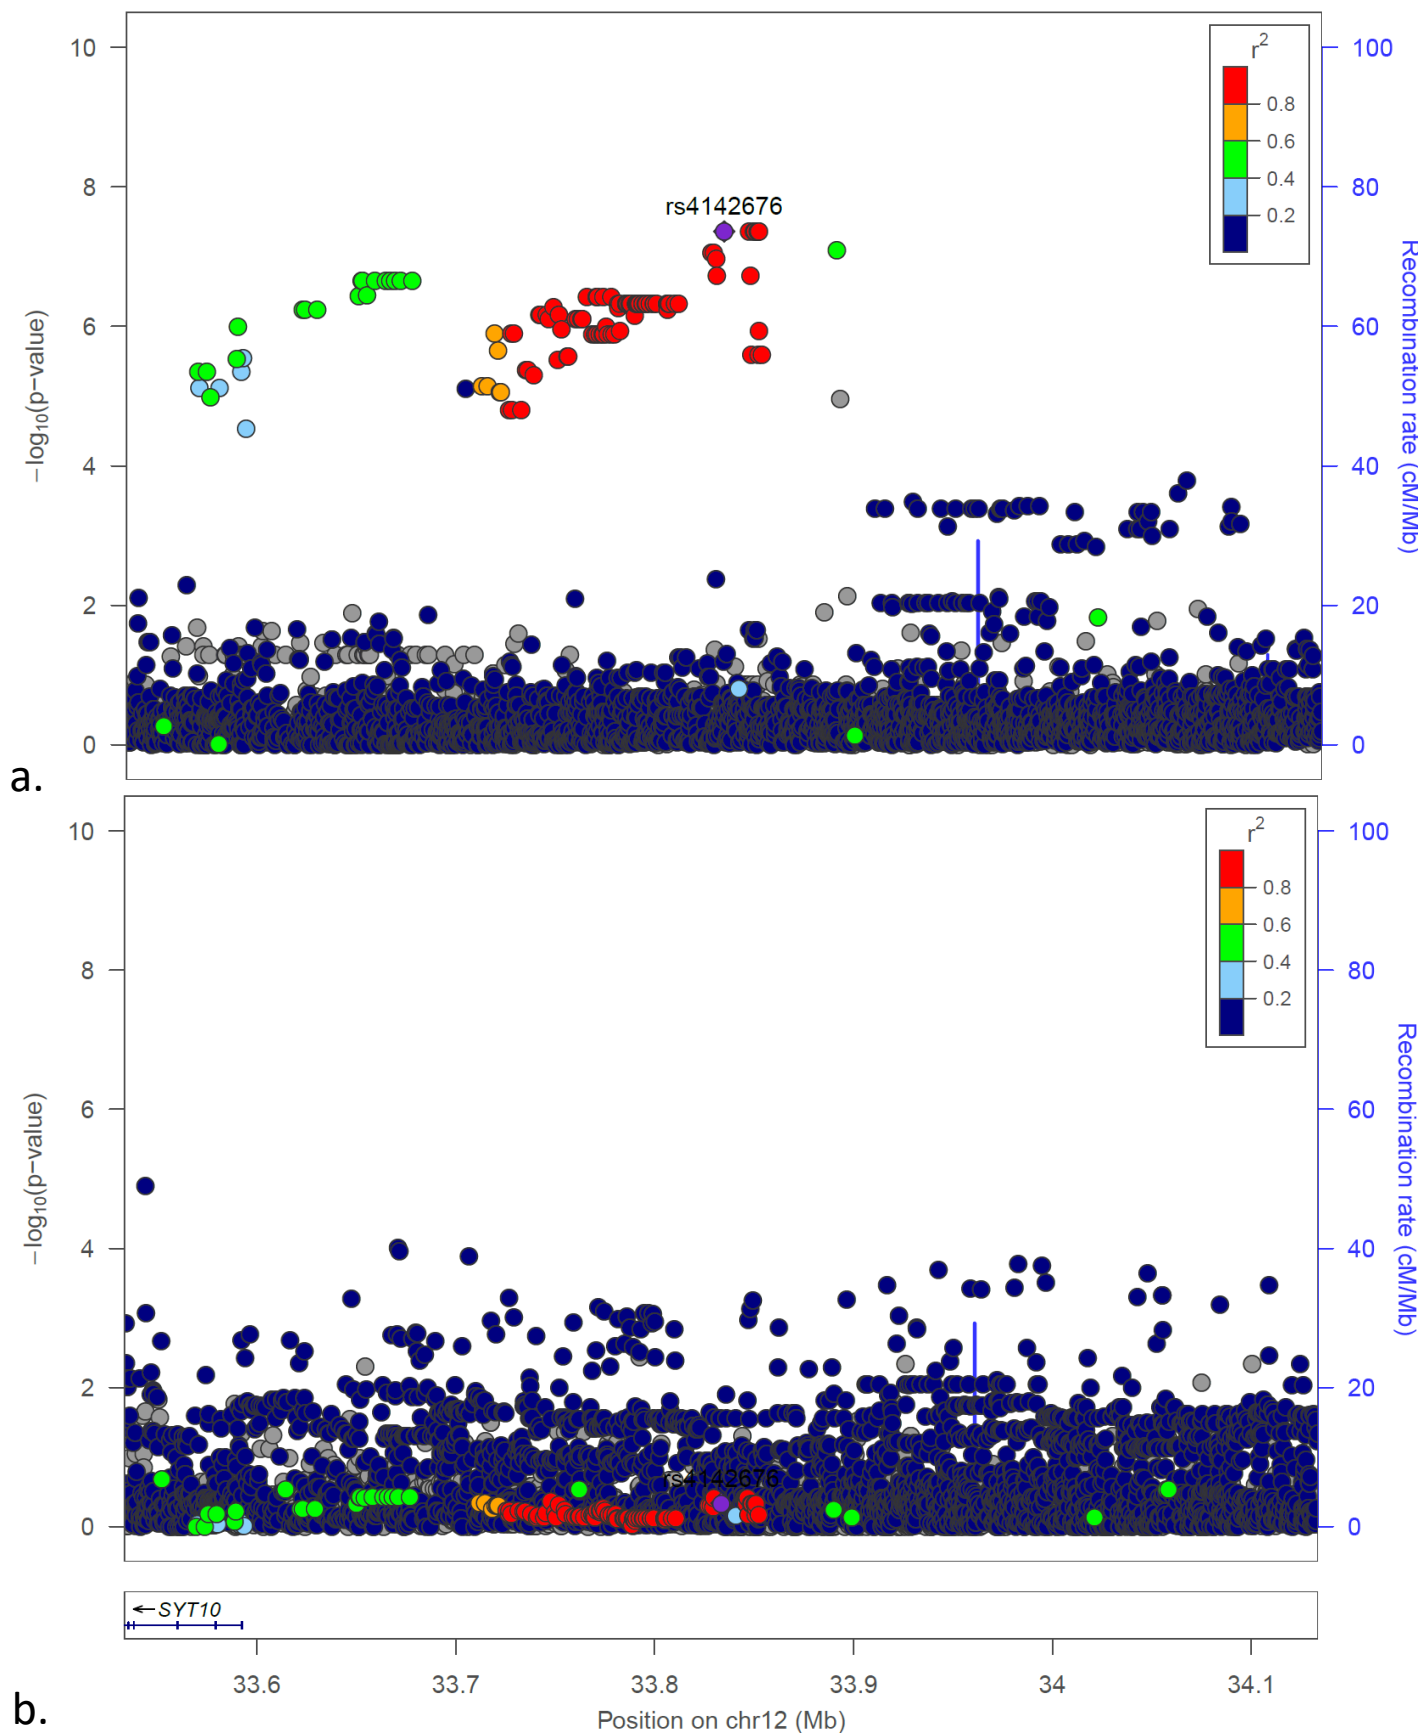

**Supplementary Figure 19.** The LocusZoom plots for the *SYT10/ALG10* locus (rs4142676). (a) The plot of the association tests of T1D patients with low T1D PRS compared to controls with low T1D PRS; (b) The plot of the association tests of all T1D patients compared to all controls.



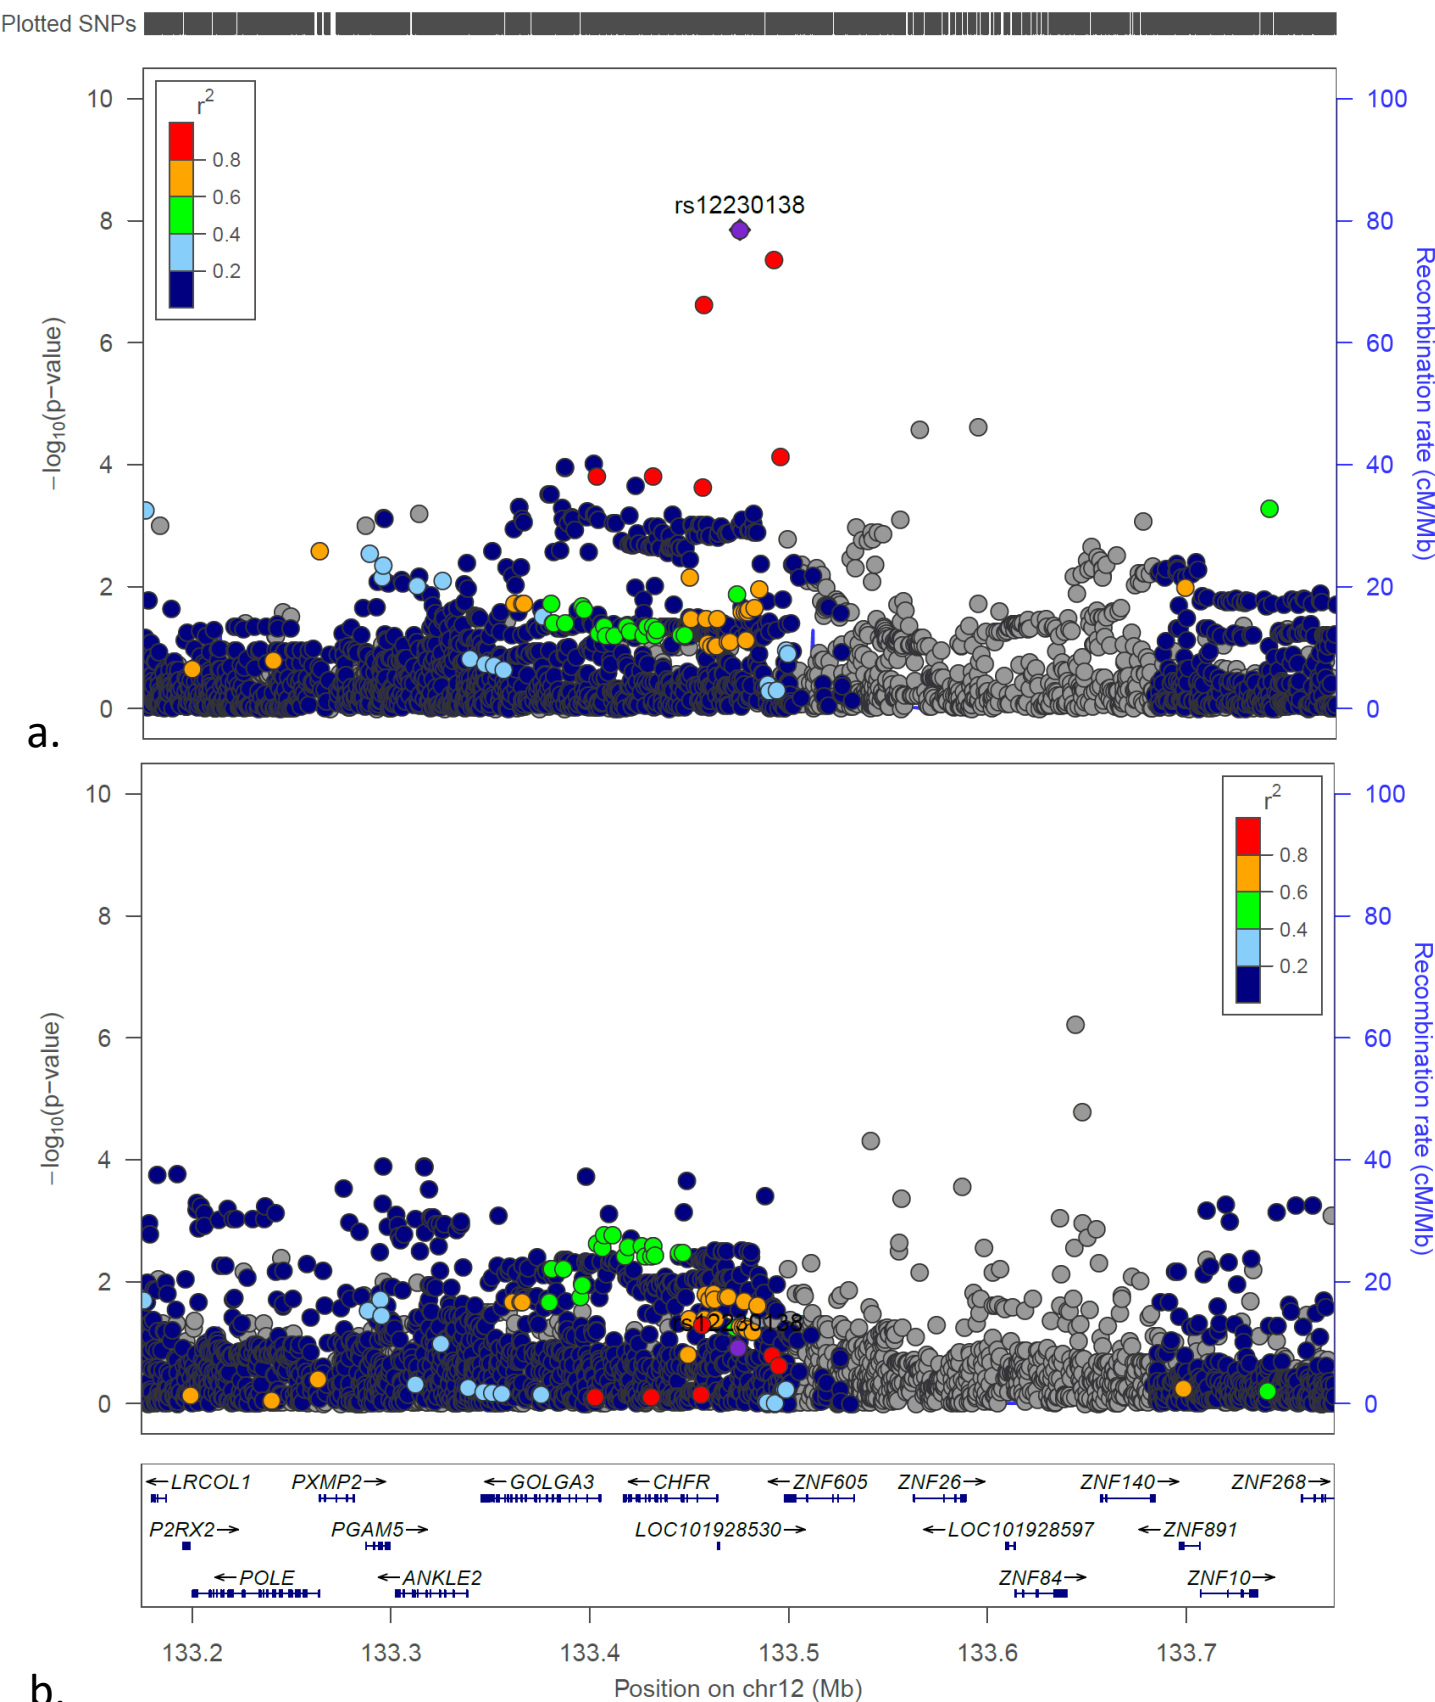

**Supplementary Figure 20.** The LocusZoom plots for the *LOC101928530/ZNF605* locus (rs12230138). (a) The plot of the association tests of T1D patients with low T1D PRS compared to controls with low T1D PRS; (b) The plot of the association tests of all T1D patients compared to all controls.

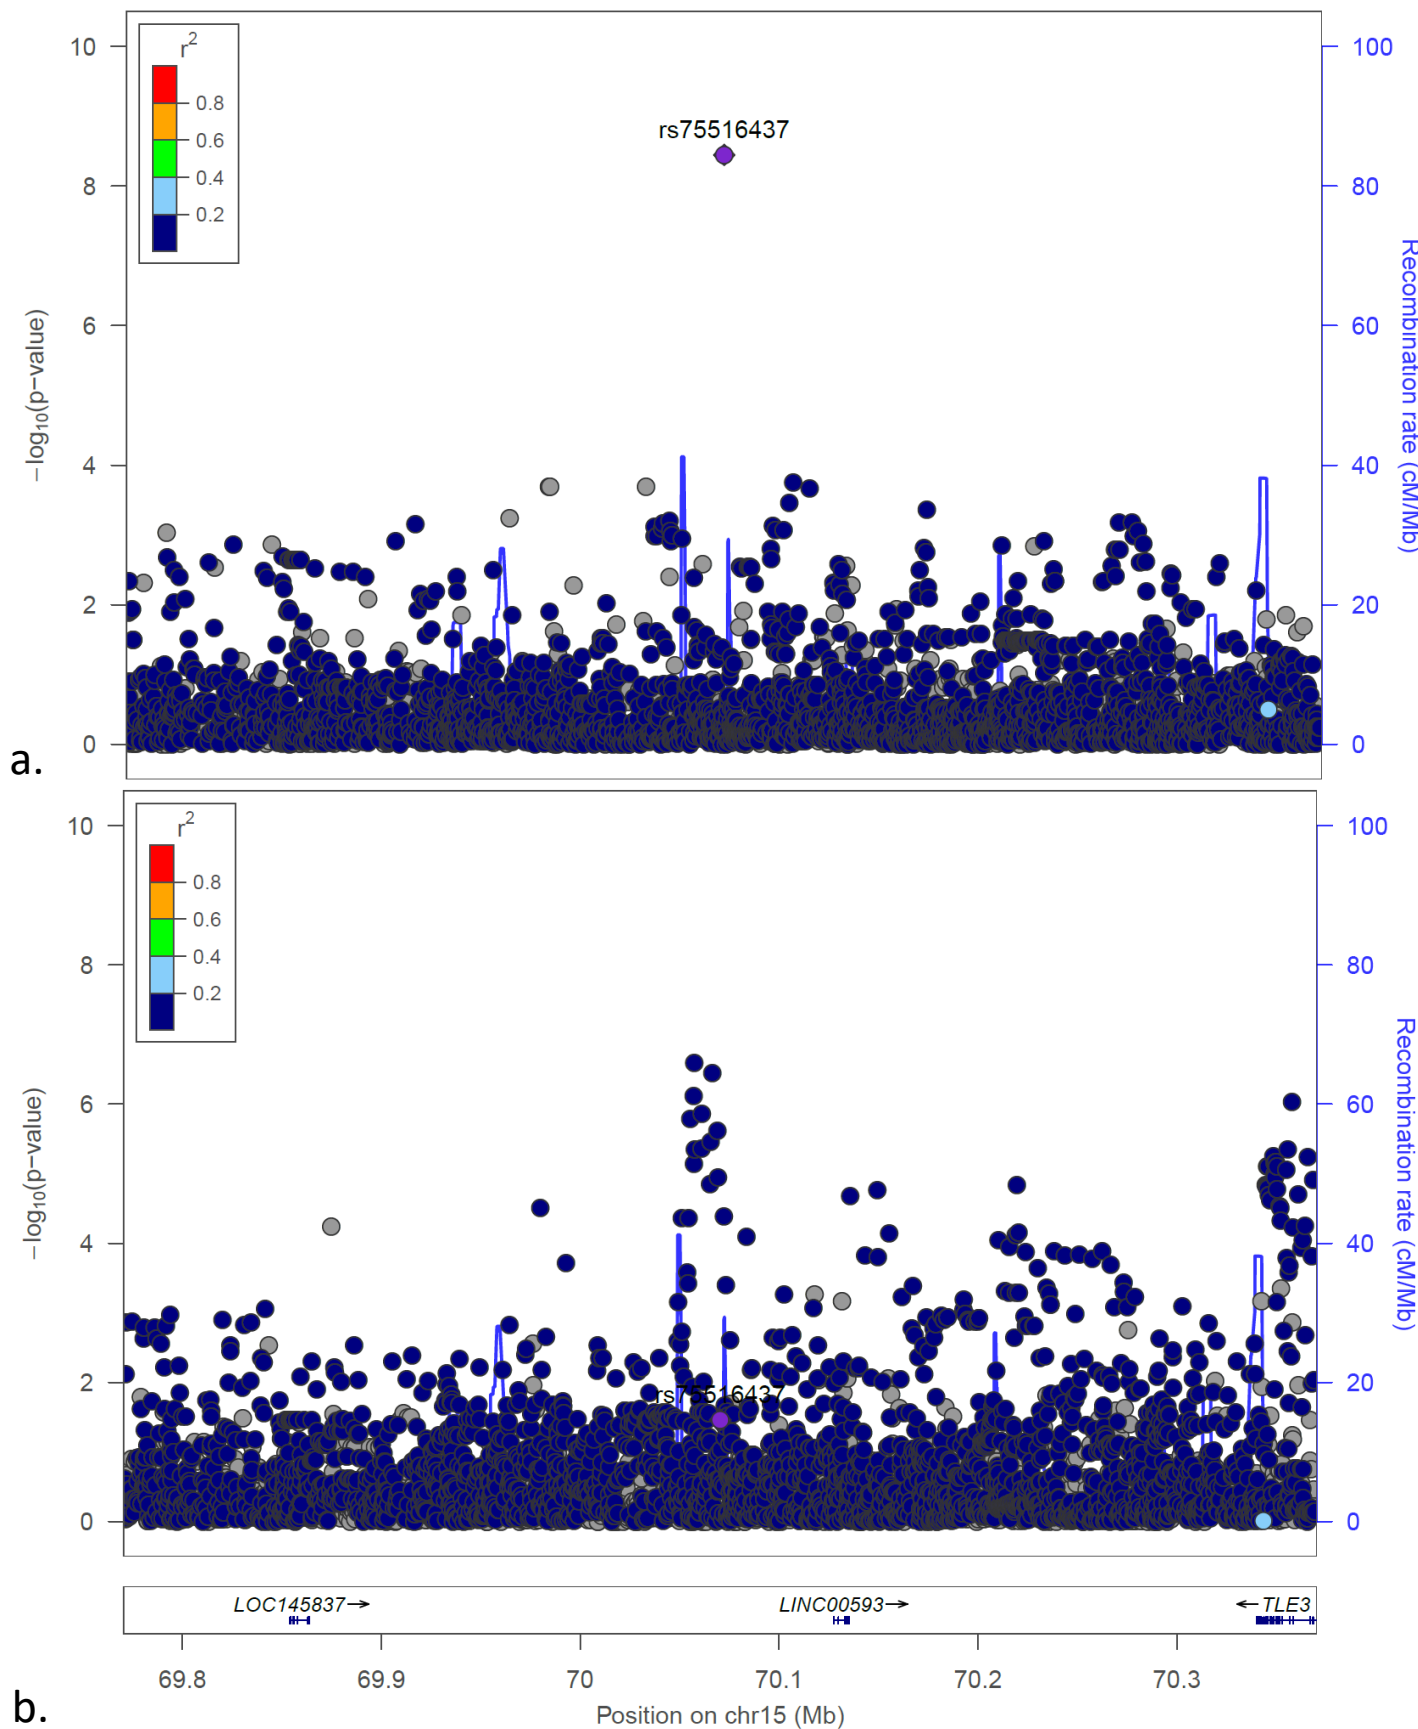

**Supplementary Figure 21.** The LocusZoom plots for the *PCAT29/LINC00593* locus (rs75516437). (a) The plot of the association tests of T1D patients with low T1D PRS compared to controls with low T1D PRS; (b) The plot of the association tests of all T1D patients compared to all controls.



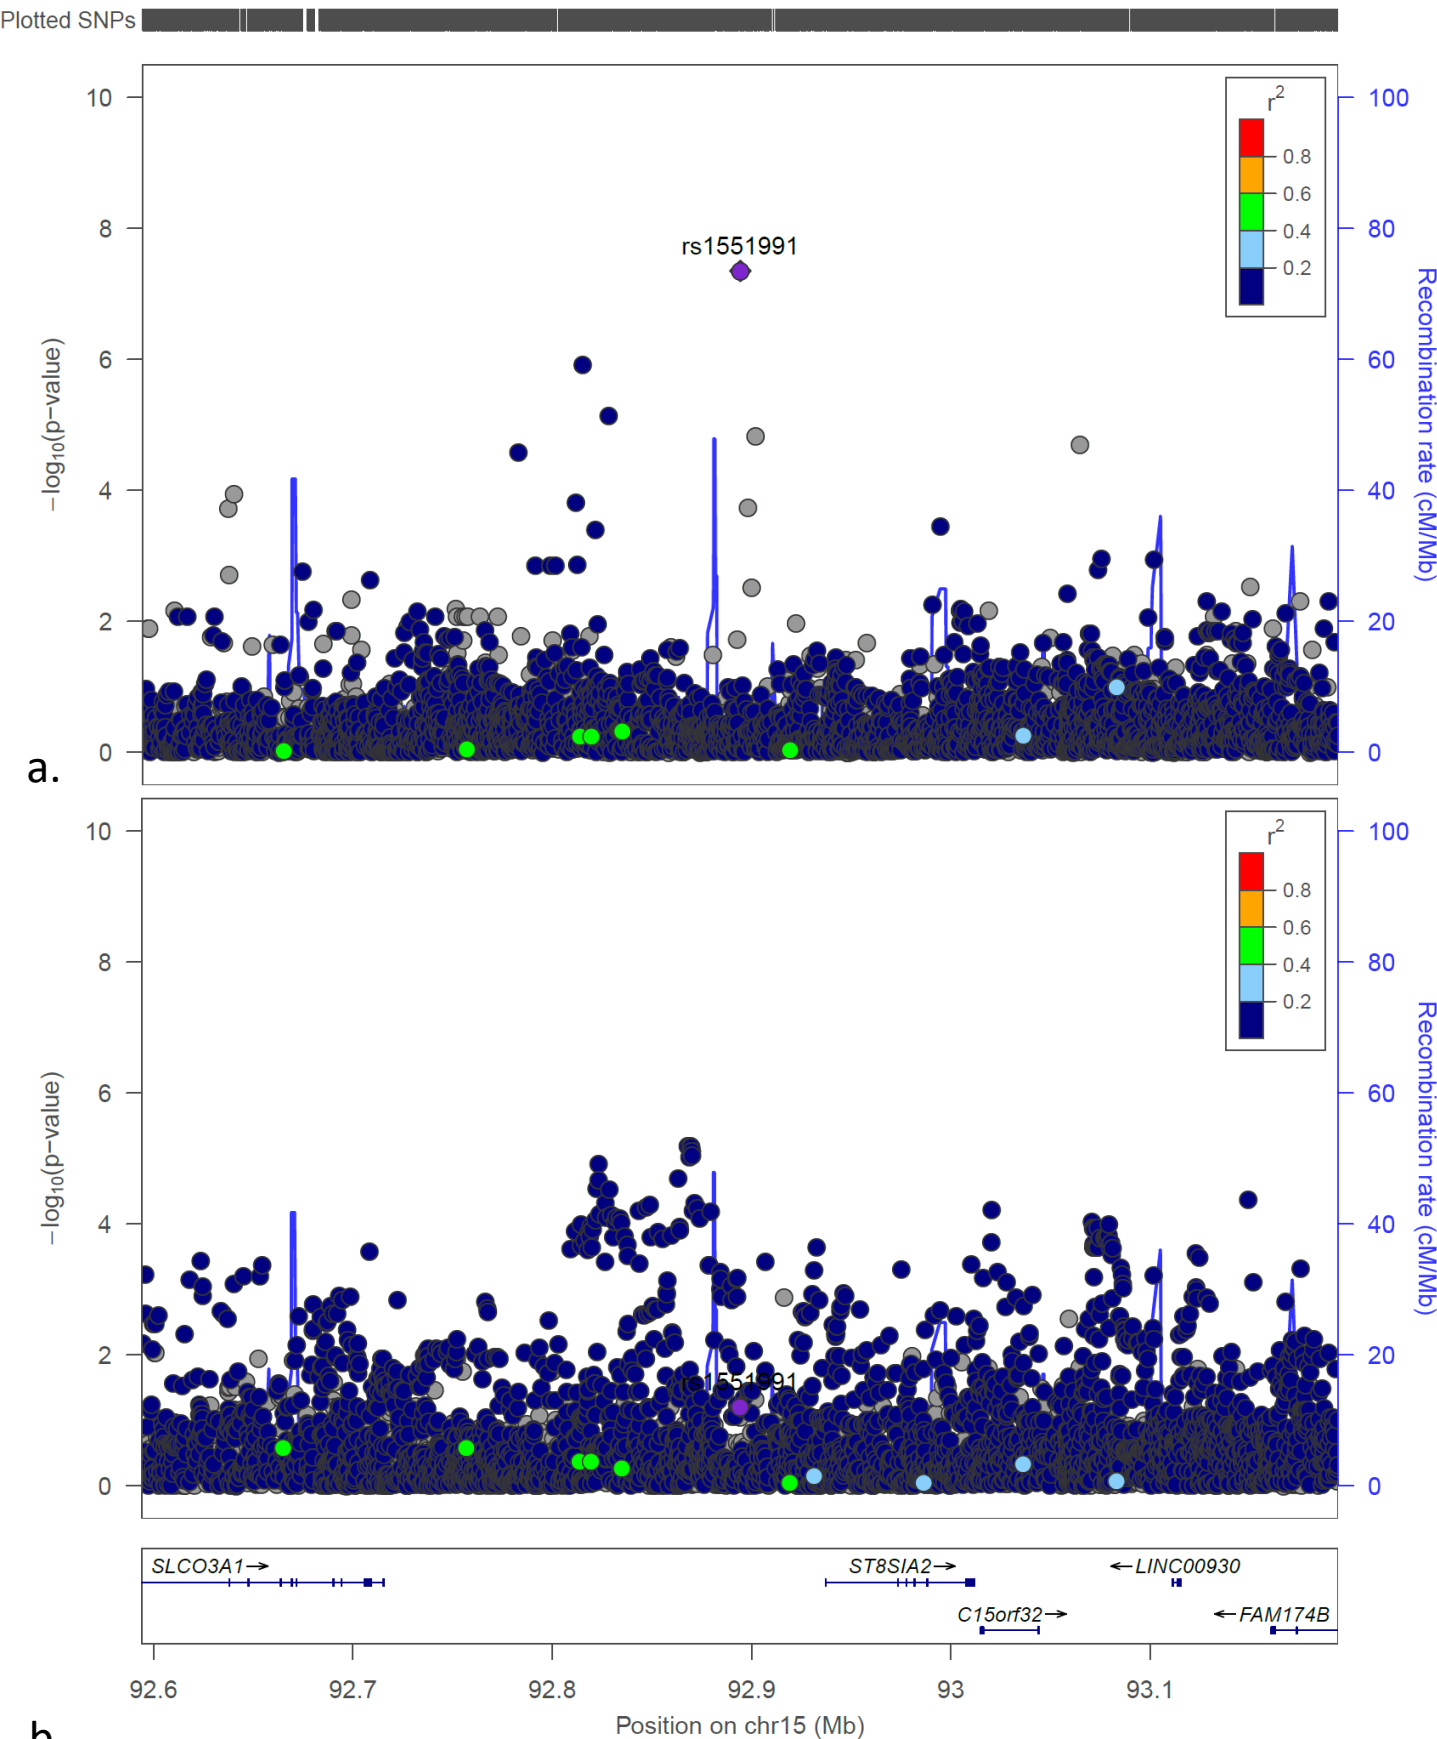

**b.** **Supplementary Figure 22.** The LocusZoom plots for the *SLCO3A1/ST8SIA2* locus (rs1551991). (a) The plot of the association tests of T1D patients with low T1D PRS compared to controls with low T1D PRS; (b) The plot of the association tests of all T1D patients compared to all controls.

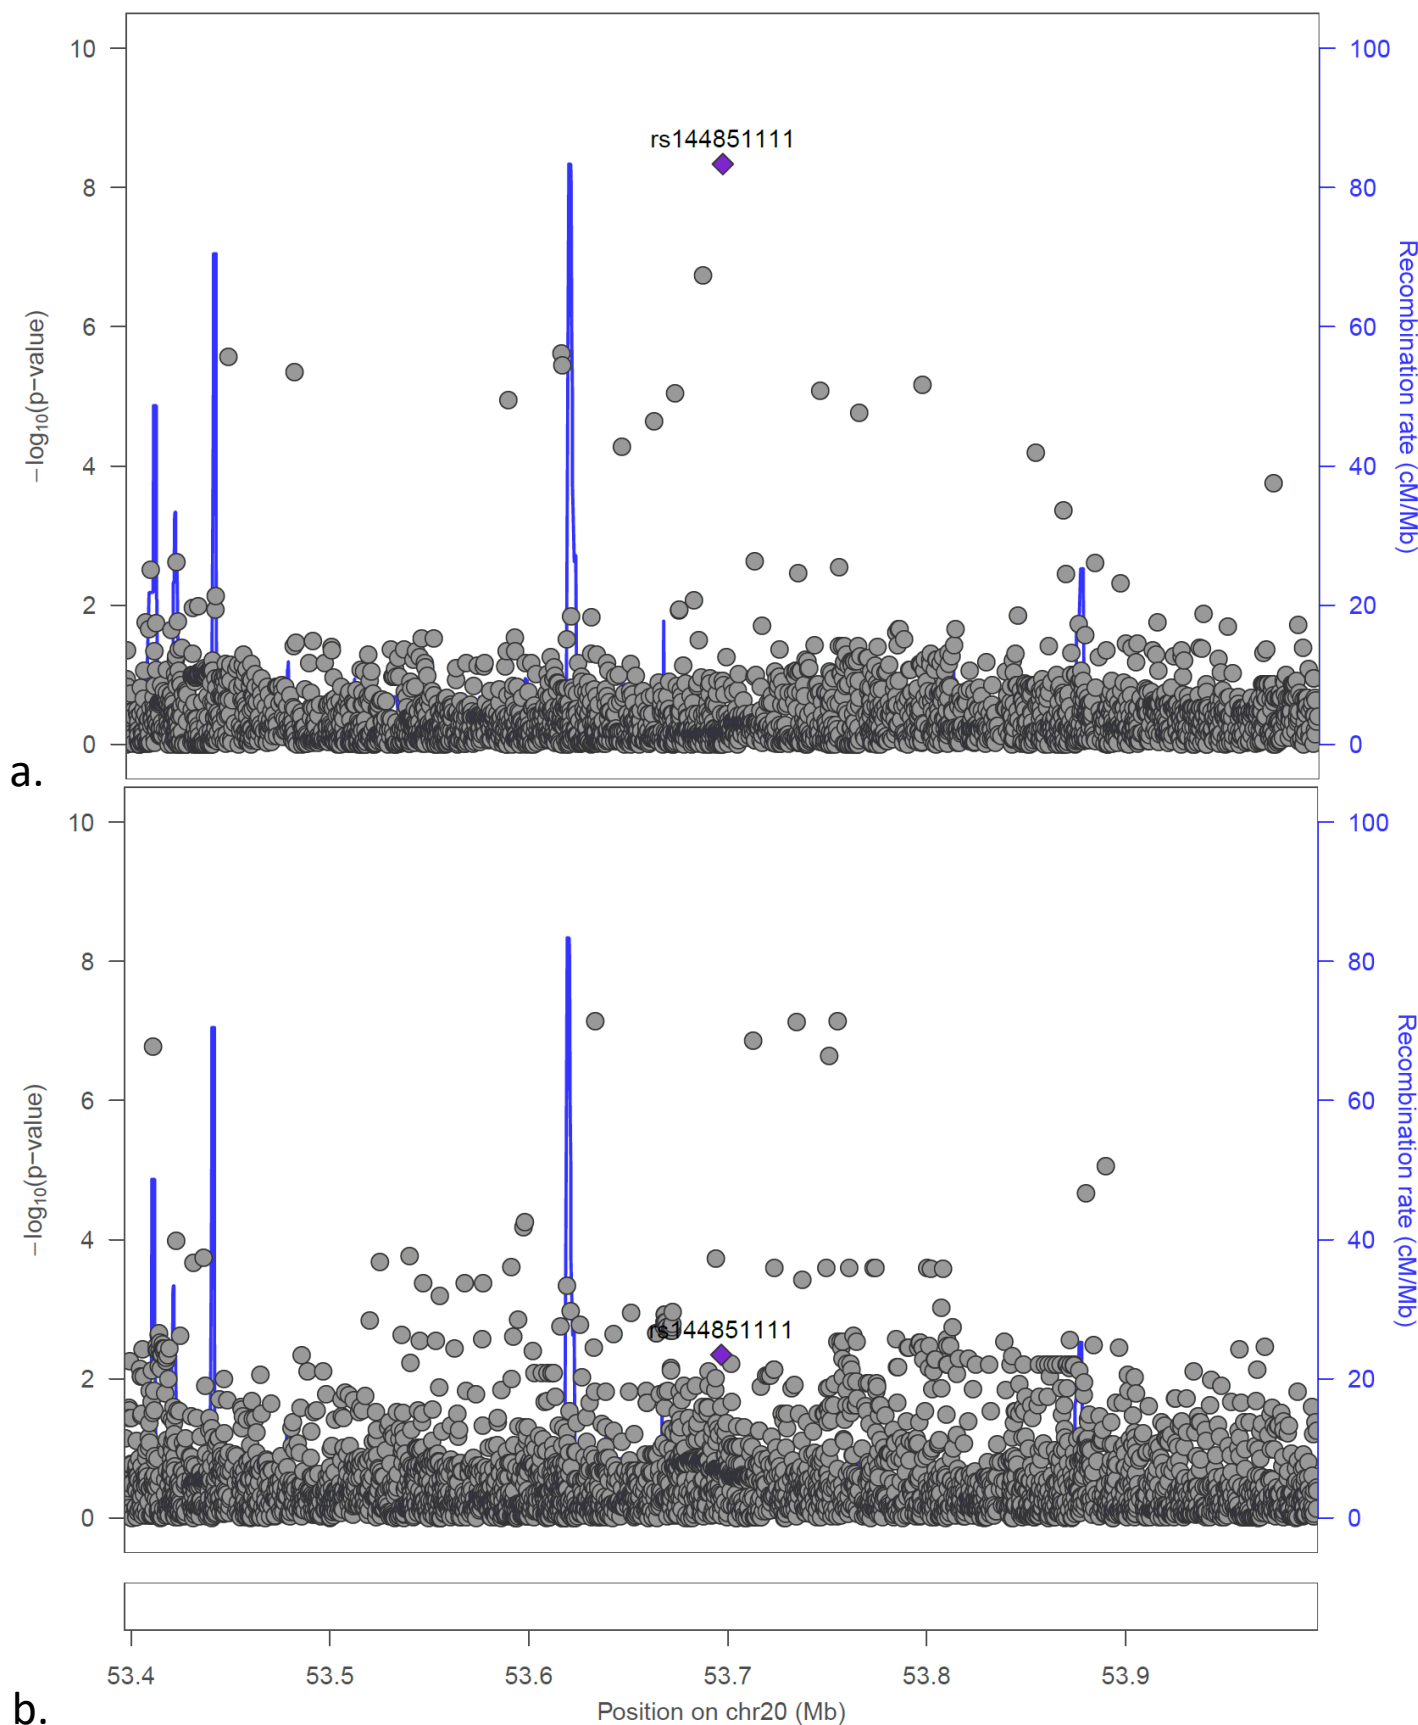

**Supplementary Figure 23.** The LocusZoom plots for the *DOK5/LINC01441* locus (rs144851111). (a) The plot of the association tests of T1D patients with low T1D PRS compared to controls with low T1D PRS; (b) The plot of the association tests of all T1D patients compared to all controls.

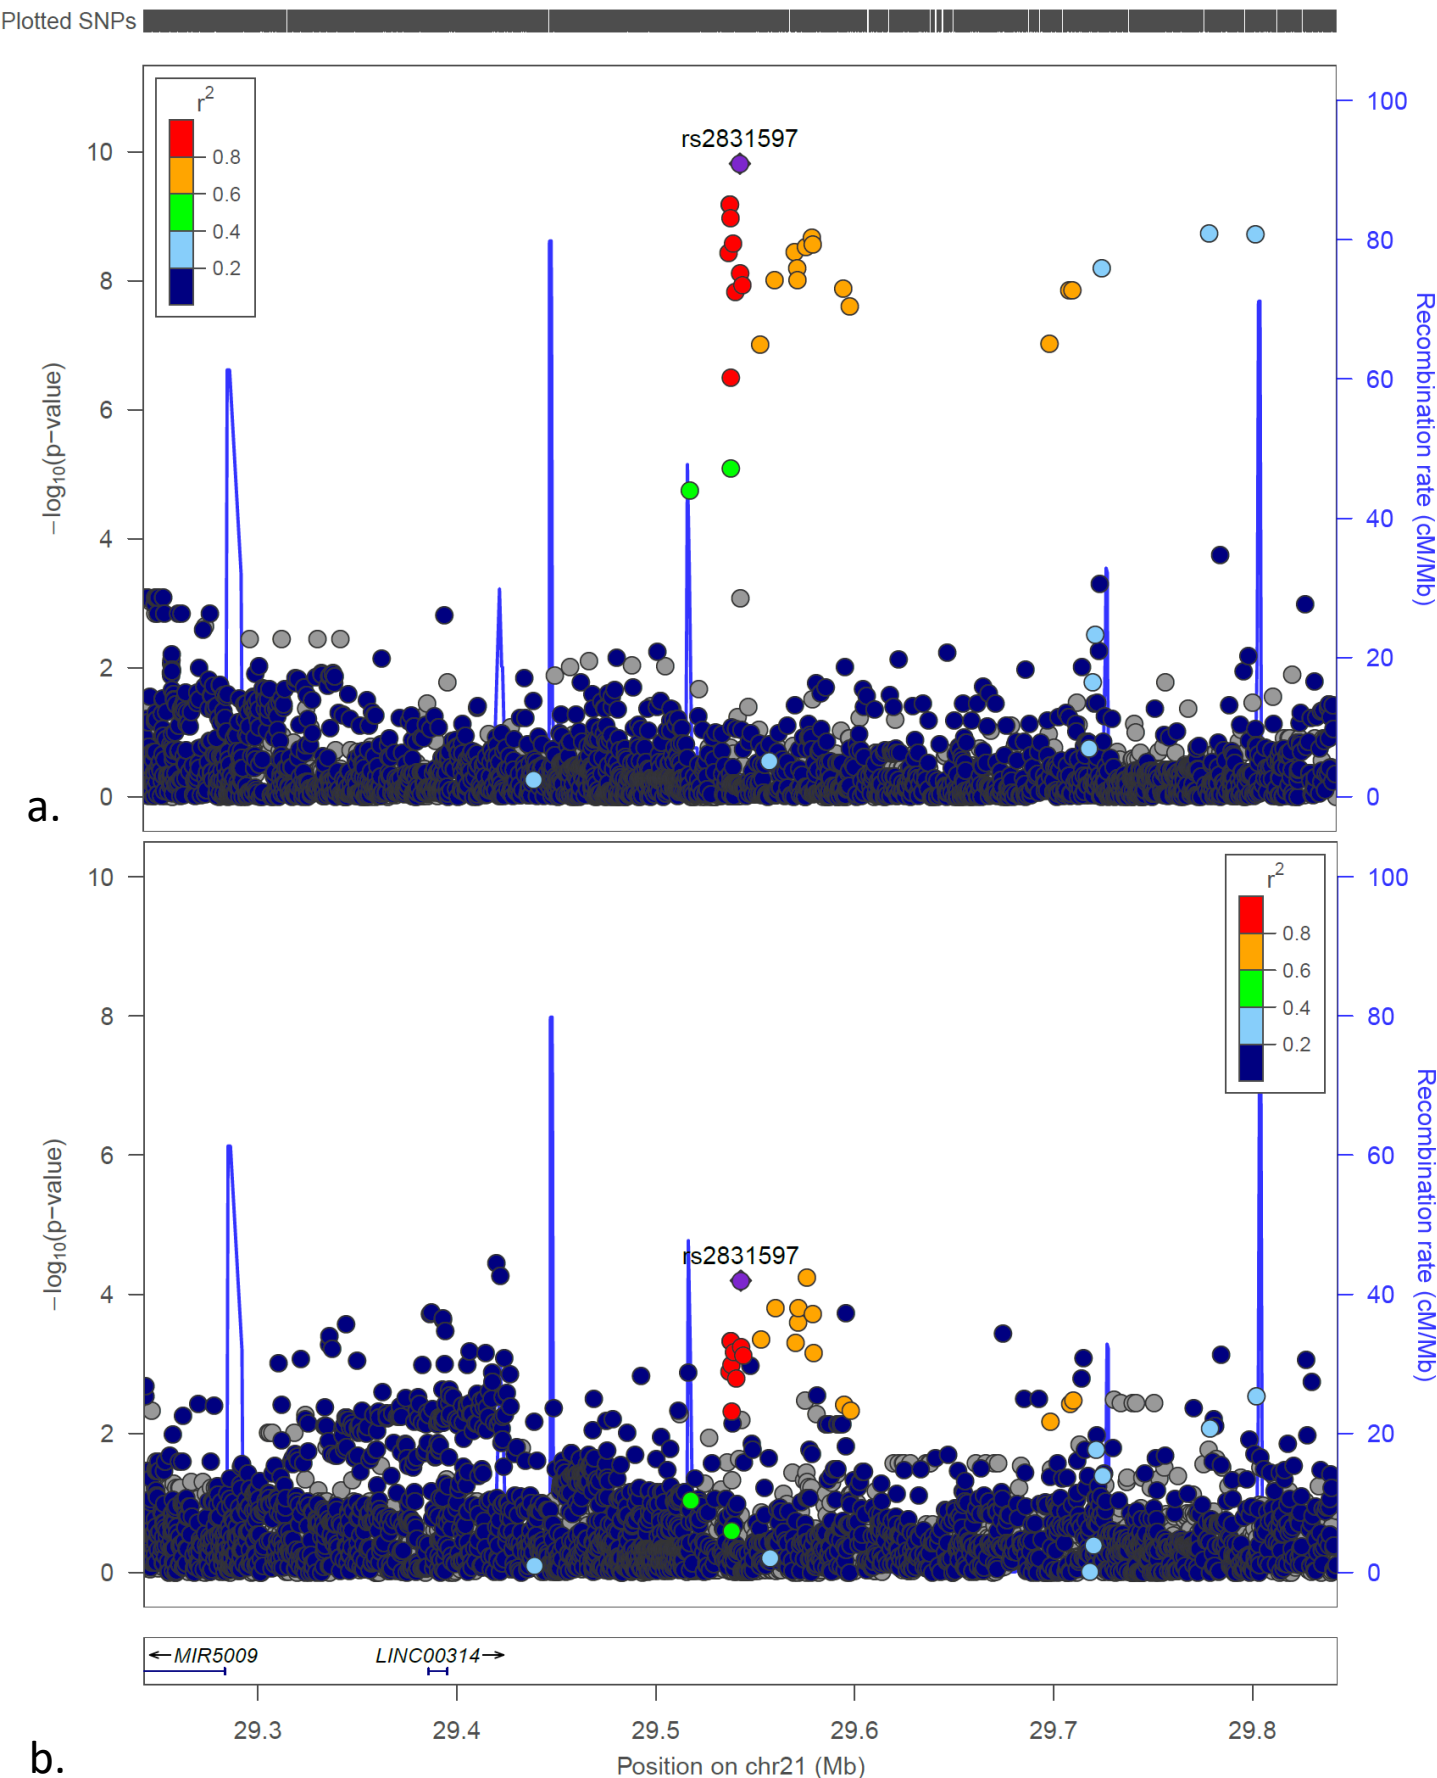

**b.** **Supplementary Figure 24.** The LocusZoom plots for the *LINC01695* locus (rs2831597). (a) The plot of the association tests of T1D patients with low T1D PRS compared to controls with low T1D PRS; (b) The plot of the association tests of all T1D patients compared to all controls.

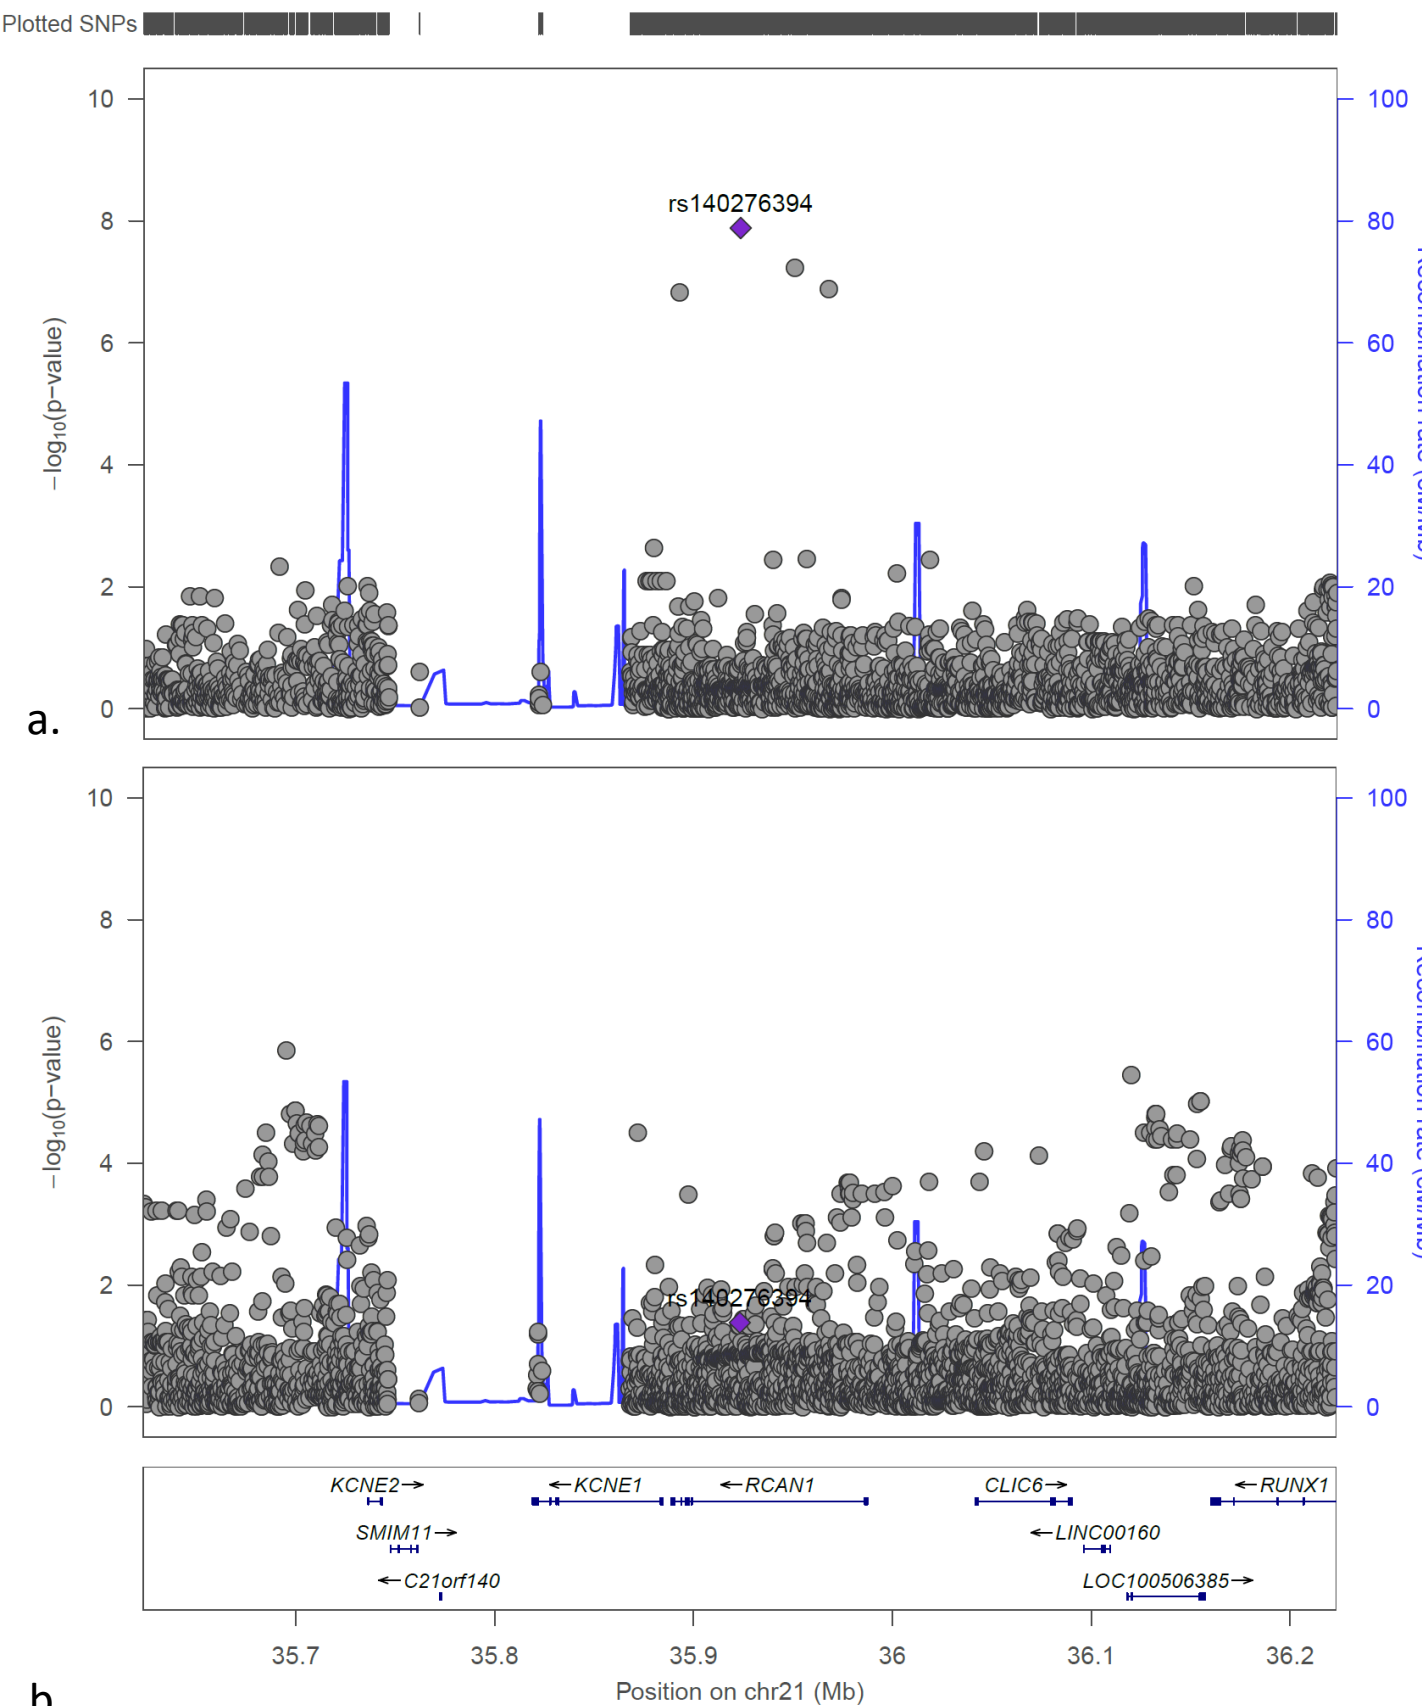

**Supplementary Figure 25.** The LocusZoom plots for the *RCAN1* locus (rs140276394). (a) The plot of the association tests of T1D patients with low T1D PRS compared to controls with low T1D PRS; (b) The plot of the association tests of all T1D patients compared to all controls.
